# Supplementary material for: Separating of Overstory and Understory Leaf Area Indices forGlobal Needleleaf and Deciduous Broadleaf Forests by Fusion ofMODIS and MISR Data
Source: Copernicus journal article supplement (doi:10.5194/bg-2016-448), 2016-11-08
Supplement: Supplementary file [file bg-2016-448-RC3-supplement.pdf]

# Separating of Overstory and Understory Leaf Area Indices for Global Needleleaf and Deciduous Broadleaf Forests by Fusion of MODIS and MISR Data

Yang Liu<sup>1</sup>, Ronggao Liu<sup>1</sup>, Jan Pisek<sup>2</sup>, Jing M. Chen<sup>3,4</sup>

5 <sup>1</sup>State Key Laboratory of Resources and Environmental Information System, Institute of Geographic Sciences and Natural Resources Research, Chinese Academy of Sciences, Beijing, 100101, China

<sup>2</sup>Tartu Observatory, Toravere, 61602, Estonia

<sup>3</sup>Nanjing University, Nanjing, 210046, China

<sup>4</sup>Department of Geography and Program in Planning, University of Toronto, Toronto, Ontario, M5S 3G3, Canada

10 *Correspondence to:* Ronggao Liu (liurg@igsrr.ac.cn)

**Abstract.** Forest overstory and understory layers differ in carbon and water cycle regimes, phenology, as well as ecosystem functions. Separate retrievals of Leaf Area Index (LAI) for these two layers would help to improve modeling forest biogeochemical cycles and evaluating forest ecosystem functions. In this paper, overstory and understory LAI values were estimated separately for global needleleaf and deciduous broadleaf forests by fusing MISR and MODIS observations. Monthly forest understory LAI was retrieved from the forest understory reflectivity estimated using MISR data. After correcting for the background contribution using monthly mean forest understory reflectivities, the forest overstory LAI was estimated from MODIS observations. The results demonstrate that forest understory vegetation is mainly distributed in the boreal forest zones at northern latitudes. Significant seasonal variations are presented for understory vegetation in these zones with LAI values up to 2-3 from June to August. Higher understory LAI values are found in needleleaf forests (with mean value of 1.06 for evergreen needleleaf forests and 1.04 for deciduous needleleaf forests) than in deciduous broadleaf forests (0.96) due to the more clumped foliage and easier penetration of light to the forest floor in needleleaf forests. The magnitude of seasonal variations of overstory LAI is larger for deciduous needleleaf forests than those of evergreen and deciduous needleleaf forests. In contrast, for forest understory, needleleaf forests show larger seasonal variations than broadleaf forests. Spatially and seasonally variable forest understory reflectivity helps to account for the effects of the forest background on LAI retrieval while compared with constant forest background. The retrieved forest overstory and understory LAI values were compared with an existing dataset for larch forests in Northern Eurasia. The retrieved overstory and understory LAI is close to that of the existing dataset, with an absolute error of 0.34 (0.06), relative error of 21.1% (14.3%) and RMSE of 0.93 (0.29) for overstory (understory). The comparisons between our results and field measurements in eight forest sites show that the  $R^2$  are 0.62 and 0.52, and the RMSE are 0.62 and 1.36 for understory and overstory LAI, respectively.

## 1 Introduction

Forests not only provide habitats and food for animals and fibers and fuel for human beings but also control the global climate and biogeochemical cycles. Most forests, excluding tropical rainforests, have two distinct layers: an overstory layer that mainly consists of arbors, and an understory layer that includes shrubs, grasses and moss. These layers are often treated differently in ecosystem modelling due to their different photosynthetic capacity, carbon residence times, phenology and climatic and environmental responses (Vogel and Gower, 1998; Rentch et al., 2003; Marques et al., 2004; Kim et al., 2016). The understory vegetation plays an essential role in supporting biodiversity, the nutrient cycling and the capability of soil and water conservation in forests (Suchar and Crookston, 2010; Qiao et al., 2014). The Leaf Area Index (LAI) is critical in describing the water, carbon and energy exchange of vegetation with the atmosphere (Braswell et al., 1997; Gitelson and Kaufman, 1998). Global wall-to-wall LAI dataset with separation of forest LAI for overstory and understory layers would help to improve the modelling of forest carbon and water cycles and the evaluation of forest ecosystem functions (Law and Waring, 1994).

Satellite remote sensing provides powerful tools for the estimation of global forest LAI. Several global LAI products have been produced from satellite observations, such as MOD15 from Terra-Aqua/MODIS data (Myneni et al., 2002), CYCLOPES (Baret et al., 2007) and GEOV-1 (Baret et al., 2013) from SPOT/VEGETATION data, MERIS LAI from ENVISAT/MERIS data (Bacour et al., 2006) and GLOBMAP LAI from a combination of Terra/MODIS and NOAA/AVHRR data (Liu et al., 2012a). However, the LAI in these products is the total LAI, i.e., the sum of the forest overstory and understory LAI. Considerable efforts have been made to separate forest overstory and understory LAI at regional scale. For example, the overstory and understory LAI values were estimated by combining high spectral and high spatial resolution images using a neural network method and field measurements in Longmenhe forest nature reserve in China (Huang et al., 2011). The LAI was also estimated separately for larch forests in Northern Eurasia using its relationship with the normalized difference water index (NDWI) based on the three-dimensional radiative transfer model (Kobayashi et al., 2010), which assumed that the understory LAI is stable over the entire year so that it is only applicable to deciduous forests with evergreen understory. As forests can vary considerably even within a particular land cover type due to their complex structures and multiplicity of species, global dataset is highly desirable to describe the heterogeneous spatial distribution of forest overstory and understory.

Multi-angle remote sensing could capture signals of different forest layers because the observed proportions for different forest layers vary with the viewing angle, making it possible to separate forest overstory and understory LAI on global scale. Forest background reflectivity, which is the reflectance of materials below the forest canopy, including understory vegetation, leaf litter, moss, lichen, rock, soil, snow, etc. was estimated from Multi-angle Imaging SpectroRadiometer (MISR) (Canisius and Chen, 2007; Pisek and Chen, 2009) and Multiangle Compact Airborne Spectrographic Imager (Pisek et al., 2010a) observations based on the 4-scale model (Chen and Leblanc, 1997). If the forest background reflectivity were known, LAI could be estimated separately for the forest overstory and understory. The forest background reflectivity over North America

has been derived from MISR observations at a spatial resolution of 1° (Pisek and Chen, 2009), and that result has been used to correct the effects of forest background for the determination of the forest overstory LAI over North America (Pisek et al., 2010b).

5 The daily background reflectivity in the red and Near-Infrared (NIR) bands have been retrieved over global forest areas at a resolution of 1 km using MISR observations from 2000 to 2010 (Jiao et al., 2014). Severe failed retrievals exist in this product due to the large amount of fill values in the MISR daily land surface products. To generate spatially coherent 1-km resolution maps, the monthly mean forest background reflectivity was derived by averaging the valid daily background reflectivity during the 11-year period. This dataset makes it possible to separate the forest overstory and understory LAI globally.

10 The forest overstory is the main component for carbon fixation and changes seasonally and inter-annually. If the forest background is assumed to change only from month to month but remain stable in the same month of different years, the high temporal resolution of overstory LAI can be inferred from satellite measurements with the help of the MISR forest background reflectivity. It takes 9 days for the MISR to acquire global coverage, which makes it challenging to capture the integrated seasonal patterns of global forest overstory. As MODIS provides global radiative measurements in 1-2 days, combination of MODIS data and MISR forest background reflectivity could help estimation of forest overstory LAI. In this paper, the forest overstory and understory LAI values were separated for global needleleaf and deciduous broadleaf forest based on the global 1-km MISR forest background reflectivity and the MODIS observations from 2008 to 2010. The monthly mean forest understory LAI was retrieved from the MISR forest background reflectivities in the red and NIR bands. The overstory LAI was determined from the MODIS land surface reflectance with the effects of forest background corrected by using the MISR forest background reflectivity. Because notable uncertainties may be introduced in the understory LAI retrieval for evergreen broadleaf forests in tropical zones due to the excessive complexity of the forest structure, which makes it difficult to separate it into two layers, the evergreen broadleaf forest type is excluded in this study.

## 2 Data and Methods

### 2.1 Data

#### 25 2.1.1 MODIS and MISR background reflectivity data

Several MODIS products and the forest background reflectivity were used in this study. The forest overstory LAI was retrieved from the MODIS land surface reflectance product MOD09A1 from 2008 to 2010. The land cover type was defined by the MODIS product MCD12Q1. The MODIS Surface Reflectance Product MOD09A1 provides global 8-day composite 500-m resolution land surface reflectance in bands 1-7 without the effects of the atmospheric gases and aerosols since February 2000. The MODIS land cover type product (MCD12Q1) supplies a yearly land cover classification map with a 500-m resolution of the globe derived through a supervised decision tree classification method with 5 different classification

schemes. In this study, the product from the IGBP global vegetation classification scheme is selected. The MOD09A1 and MCD12Q1 products are all provided in the Sinusoidal grid.

The forest understory LAI was derived from the MISR forest background reflectivity. The MISR seasonal forest background reflectivity dataset provides monthly reflectivities in the red and NIR bands over global forest areas at  $0.01^\circ$  (approximately 1 km) resolution with the geographic coordinate, which represents the reflectance for all materials below the forest canopy, such as understory vegetation, rocks, soils, leaf litter, lichens, mosses, snow, or their mixture. The daily reflectivity was derived from the MISR daily surface bidirectional reflectance factor (BRF) in the nadir and  $45.6^\circ$  forward directions (An and Bf cameras) from 2000 to 2010 based on the 4-scale model. Then, monthly forest background reflectivity was produced by combining 11-year daily results for each month to replace a large number of invalid retrievals due to high share of missing data in the MISR Land Surface Products (Jiao et al., 2014).

All MODIS data were pre-processed to the geographic coordinate, which is the same as the forest background reflectivity. MOD09A1 and MCD12Q1 images from 2008 to 2010 were transformed to geographic projections at a  $0.005^\circ \times 0.005^\circ$  (approximately 500 m) spatial resolution using the nearest neighbour interpolation and then composed to form global maps. The MOD09A1 land surface reflectance was screened for cloud contamination based on a refined cloud mask for MODIS land surface reflectance products, which effectively identifies the cloudy pixels based on the inflexion point between the clear-sky and cloudy observations of times series of reflectances assemblage for the same location (Liu and Liu, 2013). And the snow/ice pixels were also labelled with MOD09A1 state flags.

### 2.1.2 Field measurements of forest overstory and understory

Ground LAI measurements of forest overstory and understory were collected from related references for the evaluation of the derived LAI products. These include 28 field LAI measurements for forest overstory at eight sites and 12 measurements for forest understory at Prince Albert National Park, Saskatchewan, Canada. Detailed information about these measurements is presented in Table 1. The overstory LAI measurements provided effective LAI in five conifer-dominated boreal forest sites in Finland, while true LAI was provided for other two deciduous broadleaf forest and one deciduous needleleaf forest sites along a wide latitudinal gradient on the Northern Hemisphere ( $37.75^\circ$  N- $66.45^\circ$  N) (Table 1). Here, those effective LAI values were converted to true LAI using the clumping index of the corresponding pixel in the global 500 m-resolution map derived from MODIS BRDF product (He et al., 2012).

Furthermore, seasonal field measurements of understory NDVI at seven sites were also used to evaluate the retrieved understory LAI. These sites include different forest types and understory species: a sparse black spruce forest in Alaska (PFRR), a dense black spruce forests in Canada (Sudbury), two southern boreal forest stands in Finland with dominant tree species of Scots pine (Hyttiälä Xeric) and birches (Hyttiälä Herb Rich), hemiboreal needleleaf (pine, Järvelja RAMI Pine)

and deciduous (birch, Järvelja RAMI Birch) stands in Estonia, and a temperate mixed forest in Switzerland (Laegern). Table 2 shows the detailed information of these sites. The understory vegetation is mainly composed of herbaceous species at Hyytiälä Herb Rich, Järvelja RAMI Birch and Laegern sites, while it is shrubs, herbs and mosses in other four sites.

5 **Table 1. Summary of field LAI measurements used for validation with the derived forest overstory and understory LAI**

| Site (Country)                                   | Latitude | Longitude | Biome | Date           | CI | Reference                                    |
|--------------------------------------------------|----------|-----------|-------|----------------|----|----------------------------------------------|
| Gwangneung (Korea)                               | 37.75°   | 127.15°   | DBF   | 2013/4-6       | Y  | Ryu et al. (2014)                            |
| Prince Albert National Park (Canada)             | 53.70°   | -106.20°  | DBF   | 2000-2003/4-10 | Y  | Barr et al. (2004)                           |
| Spasskaya Pad experimental larch forest (Russia) | 62.26°   | 129.62°   | DNF   | 2000/6         | Y  | Suzuki et al. (2001); Kobayashi et al., 2010 |
| Puumala (Finland)                                | 61.53°   | 28.71°    | BF    | 2000/6         | N  | Heiskanen et al. (2011)                      |
| Saarinen (Finland)                               | 62.68°   | 27.49°    | BF    | 2001/7         | N  | Heiskanen et al. (2011)                      |
| Hirsikangas (Finland)                            | 62.64°   | 27.01°    | BF    | 2003/8         | N  | Heiskanen et al. (2011)                      |
| Rovaniemi (Finland)                              | 66.45°   | 25.36°    | BF    | 2004/5-10      | N  | Heiskanen et al. (2011)                      |
| Hyytiälä (Finland)                               | 61.85°   | 24.31°    | BF    | 2008/6-7       | N  | Heiskanen et al. (2011)                      |

CI stands for clumping status. For Biome, DBF, DNF and BF stand for deciduous broadleaf forests, deciduous needleleaf forests and boreal forests, respectively. For CI, the value Y(N) means the clumping effects have (have not) been taken into account in the LAI measurement.

**Table 2. Summary of field NDVI measurements used for comparison with the derived forest understory LAI**

| Site | Latitude | Longitude | Overstory biome | Dominating understory species | Date | Illumination | Reference |
|------|----------|-----------|-----------------|-------------------------------|------|--------------|-----------|
|------|----------|-----------|-----------------|-------------------------------|------|--------------|-----------|

| (Country)                            |        |          |                                 |                                                                                                 |                                                                                                                                     | conditions                   |           |                       |
|--------------------------------------|--------|----------|---------------------------------|-------------------------------------------------------------------------------------------------|-------------------------------------------------------------------------------------------------------------------------------------|------------------------------|-----------|-----------------------|
| PFRR<br>(USA)                        | 65.12° | -147.50° | Boreal (ENF)                    | <i>Vaccinium corymbosum</i> , moss, and<br><i>Picea mariana</i>                                 | lichen                                                                                                                              | 2010/6                       | clear sky | Pisek et al.,<br>2016 |
| Sudbury<br>(Canada)                  | 47.16° | -81.76°  | Boreal (ENF)                    | <i>Hylocomium splendens</i> ,<br><i>Picea mariana</i>                                           | <i>Ledum</i><br><i>groenlandicum</i> ,<br>and<br><i>Chamaedaphne calyculata</i>                                                     | 2007/6                       | clear sky | Pisek et al.,<br>2010 |
| Hyytiälä<br>Herb Rich<br>(Finland)   | 61.84° | 24.32°   | Southern boreal forest<br>(DBF) | <i>Betula pubescens</i> , and<br><i>Betula pendula</i>                                          | <i>Vaccinium myrtillus</i> , <i>Vaccinium</i><br><i>vitis-idaea</i> , <i>Deschampsia flexuosa</i> ,<br>and <i>Calamagrostis spp</i> | 2010/5-<br>9                 | diffuse   | Pisek et al.,<br>2015 |
| Hyytiälä<br>Xeric<br>(Finland)       | 61.81° | 24.33°   | Southern boreal forest<br>(ENF) | <i>Pinus sylvestris</i>                                                                         | <i>Vaccinium vitisidaea</i> , <i>Calluna</i><br><i>vulgaris</i> , mosses, and lichens                                               | 2010/5-<br>9                 | diffuse   | Pisek et al.,<br>2015 |
| Järvselja<br>RAMI Birch<br>(Estonia) | 58.28° | 27.33°   | Hemiboreal forest<br>(DBF)      | <i>Betula pendula</i> , <i>Alnus</i><br><i>glutinosa</i> , and <i>Populus</i><br><i>tremula</i> | <i>Anemone nemorosa</i> , <i>Oxalis</i><br><i>acetosella</i> , <i>Agrostis Stolonifera</i> ,<br>and <i>Sphagnum spp.</i>            | 2014/4-<br>8                 | diffuse   | Pisek et al.,<br>2015 |
| Järvselja<br>RAMI Pine<br>(Estonia)  | 58.31° | 27.30°   | Hemiboreal forest<br>(ENF)      | <i>Pinus sylvestris</i>                                                                         | <i>Ledum palustre</i> , <i>Eriophorum</i><br><i>vaginatum</i> , and continuous<br><i>Sphagnum ssp.</i>                              | 2013/5-<br>9<br>2014/4-<br>7 | diffuse   | Pisek et al.,<br>2015 |
| Laegern<br>(Switzerland)             | 47.48° | 8.35°    | Temperate mixed<br>forest       | <i>Fagus sylvatica</i> , and<br><i>Picea abies</i>                                              | sparse; <i>Allium ursinum</i>                                                                                                       | 2011/9                       | clear sky | Pisek et al.,<br>2016 |

## 2.2 Methods

In this study, the forest overstory refers to the tree canopy, while the forest understory refers to the vegetation below the forest overstory tree canopy, mainly including shrubs, grasses and moss. Forest overstory and understory LAI was estimated using an algorithm for the separation of forest LAI between overstory and understory layers based on the GLOBCARBON

5 LAI algorithm. The derived forest overstory and understory LAI datasets are named GLOBMAP LAI<sub>o</sub> (hereafter referred as LAI<sub>o</sub>) and GLOBMAP LAI<sub>u</sub> (LAI<sub>u</sub>), respectively. The GLOBCARBON LAI algorithm produces the LAI using the land cover-dependent relationships between the LAI and the Vegetation Index (VI) with consideration of the BRDF effects explicitly based on the 4-Scale model and Chebyshev polynomials (Deng et al., 2006). The relationship based on Reduced Simple Ratio (RSR) is used for forests, while the relationship based on Simple Ratio (SR) is used for grasses and other non-  
10 forest biomes. First, the effective LAI ( $L_E$ ) is derived based on the function of VI (SR or RSR):

$$L_E = f_{LE\_VI} [f_{biome}(VI_{obs}) \cdot f_{BRDF}(\theta_v, \theta_s, \phi)] \quad (1)$$

where  $f_{LE\_VI}$  is the biome-specific function defining the relationships between  $L_E$  and BRDF-modified VI at a specific view and sun angle combination  $(\theta_v, \theta_s, \phi)$ ; here, SR is used for non-forest biomes and RSR for forest biomes.  $VI_{obs}$  refers

to satellite observed VI (SR or RSR).  $f_{biome}$  is the function defining the different algorithms for forest ( $f_{forest}$ ), shrub

15 ( $f_{shrub}$ ) and grass ( $f_{grass}$ ) biomes, which are presented in Sect. 2.2.1 and 2.2.2. Function  $f_{BRDF}$ , which quantifies the BRDF effects, depends on the angular reflectance behavior of the spectral bands involved.

Next, the true LAI is calculated from effective LAI retrievals ( $L_E$ ) based on clumping index ( $\Omega$ ), which accounts for the vegetation clumping effect on the plant and canopy scales:

$$LAI = L_E / \Omega \quad (2)$$

20 In this paper, the  $\Omega$  uses the global clumping index map derived from the MODIS BRDF product (He et al., 2012).

The forest understory LAI was estimated from the MISR forest background reflectivity based on the LAI algorithms for grass and shrub (see Sect. 2.2.1). The forest overstory LAI was derived from the MODIS land surface reflectance data with the effects from the background corrected based on the MISR monthly forest background reflectivity. Then, the forest total LAI was calculated by summing the forest overstory LAI and understory LAI. Figure 1 shows the general flowchart for the

25 forest overstory and understory LAI separation algorithm.

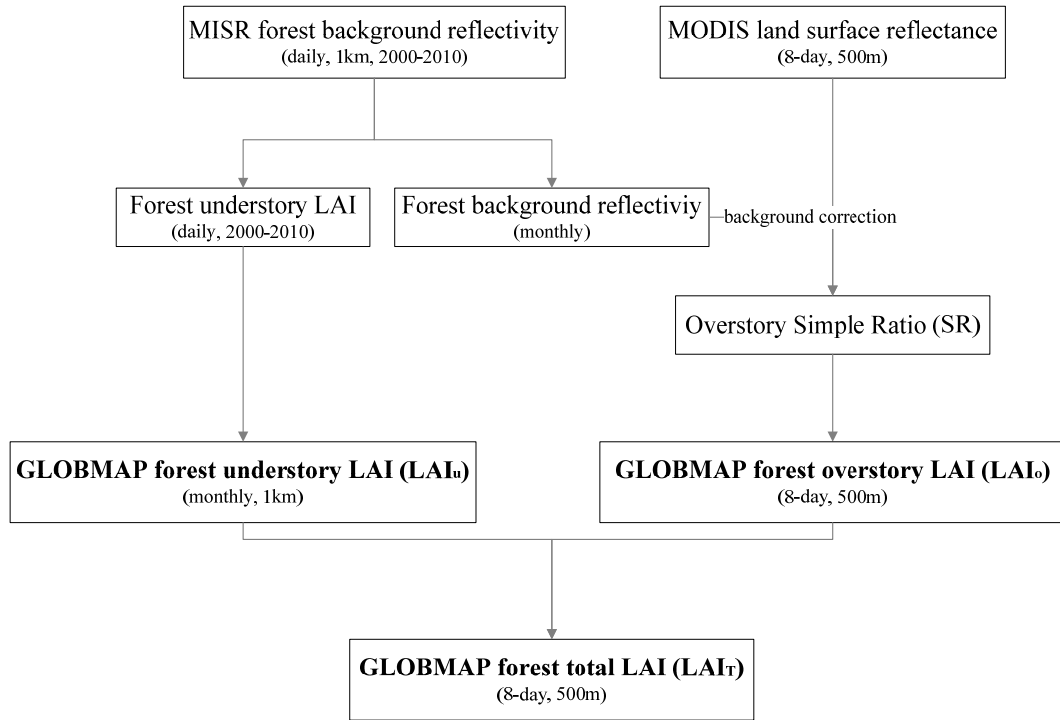

**Figure 1.** General flowchart for the GLOBMAP forest overstory and understory LAI separation algorithm

### 2.2.1 Estimation of the forest understory LAI

The LAI derived from the MISR forest background reflectivity (Jiao et al., 2014) should approximate the forest understory LAI. Here, by assuming that the forest understory has a similar composition to the mixture of shrubland, grassland and moss, its LAI was retrieved from the SR of the forest background based on the LAI algorithms for shrub and grass, which is applicable for shrub, grass and other non-forest biomes (Deng et al., 2006). First, the vegetation index SR for the forest background ( $SR_B$ ) was calculated using the daily MISR background reflectivity in the red ( $\rho_{Red\_B}$ ) and NIR bands ( $\rho_{NIR\_B}$ ):

$$10 \quad SR_B = \rho_{NIR\_B} / \rho_{Red\_B} \quad (3)$$

Then, the daily forest understory effective LAI was retrieved based on the function of  $SR_B$  using the LAI algorithm for shrub and grass, respectively (Eq. (1)). The VI uses SR, and the function  $f_{LE\_VI}$  in Eq. (1) uses the relationship between  $L_E$  and SR for shrub and grass. The effective LAI is directly derived from the SR (here using  $SR_B$ ) with no corrections except for BRDF (Eq. (4) and (5)). The corresponding solar zenith angle ( $\theta_s$ ), view zenith angle ( $\theta_v$ ) and relative azimuth

15 angle ( $\phi$ ) of the MISR cameras, which were used to generate the daily MISR forest background reflectivity, were used for correcting the BRDF effects in the retrieval of the forest understory LAI (Eq. (1)). Because the observations from two MISR



cameras were used in the generation of the MISR forest background reflectivity, including the nadir and 45.6° forward cameras, the forest understory effective LAI was calculated using the geometries in these two cameras separately, and the average value of the two results was used.

$$f_{shrub}(VI_{obs}) = SR_B \quad (4)$$

$$5 \quad f_{grass}(VI_{obs}) = SR_B \quad (5)$$

After that, the true LAI was calculated from effective LAI retrievals using the global mean value of clumping index for shrubs (0.73) and grasses (0.75) that were derived from MODIS BRDF products (He et al., 2012) (Eq. (2)). Then, these two retrievals for the two biomes were averaged and used as the true LAI for the forest understory (LAI<sub>u</sub>). Finally, the global monthly LAI<sub>u</sub> maps were produced by combining the valid daily LAI<sub>u</sub> from 2000 to 2010 for each month to generate

10 spatially coherent maps.

### 2.2.2 Estimation of the forest overstory LAI

The effects of the forest background on the MODIS observations were accounted for with the monthly forest background reflectivity maps. Next, the forest overstory LAI was retrieved using modified MODIS observations. In the GLOBCARBON LAI algorithm, the effects of the background are considered by using the background SR value of 2.4 in all of the simulations of the 4-Scale model for all forest types (Deng et al., 2006). To account for the effect of the difference between the standard background SR value (2.4) used in the model simulation and the actual background SR ( $SR_B$ ), which varies among the sites and seasons, the MODIS observed SR was adjusted by removing the effects of the background (Pisek et al., 2010b):

$$SR_{Overstory\_modified} = (2.4 - SR_B) \cos \theta_v \frac{SR_{MAX} - SR_{obs}}{SR_{MAX} - SR_B} + SR_{obs} \quad (6)$$

20 where  $SR_{Overstory\_modified}$  is the adjusted SR for the forest overstory;  $SR_{obs}$  refers to observed SR, which is calculated from the MODIS land surface reflectance (MOD09A1) in the red and NIR bands; and  $SR_{MAX}$  is the maximum SR value of the algorithm for a forest type at the view zenith angle ( $\theta_v$ ).

The monthly forest background SR ( $SR_B$ ) was calculated from the monthly MISR forest background reflectivity in the red and NIR bands. It was scaled to a 10-km resolution to reduce the noise and then used to adjust the MODIS observed SR ( $SR_{obs}$ ) based on Eq. (6). Since  $SR_B$  represents the signals from all materials below the forest canopy, the effects of the forest background were accounted for. After that, the IGBP land forest classes in the MODIS land cover product (MCD12Q1) were grouped into four forest biomes (conifer, tropical, deciduous and mixed forest). The overstory effective LAI was retrieved from this adjusted MODIS SR ( $SR_{Overstory\_modified}$ ) and corresponding MODIS geometry data using the LAI algorithm for each forest type (Eq. (1)). The function  $f_{LE\_VI}$  in Eq. (1) uses the relationship between  $L_E$  and RSR (Eq. (7))

for various forest types, and the effective LAI was retrieved from RSR with consideration of the BRDF effects in the shortwave infrared band (SWIR) (Eq. (8)).

$$RSR = SR \cdot \left( 1 - \frac{\rho_{SWIR} - \rho_{SWIR \min}}{\rho_{SWIR \max} - \rho_{SWIR \min}} \right) \quad (7)$$

$$f_{forest}(VI_{obs}) = SR_{Overstory\_modified} \cdot \left( 1 - \frac{\rho_{SWIR} \cdot f_{SWIR\_BRDF}(\theta_v, \theta_s, \phi) - \rho_{SWIR \min}}{\rho_{SWIR \max} - \rho_{SWIR \min}} \right) \quad (8)$$

5 where  $\rho_{SWIR}$  is the SWIR (band 5) reflectance for MODIS; the function  $f_{SWIR\_BRDF}$ , quantifying the BRDF effects of MODIS band 5, depends on the angular reflectance behaviour of this band; and  $\rho_{SWIR \max}$  and  $\rho_{SWIR \min}$  are the maximum and minimum values of the SWIR reflectance.

Finally, the true LAI for the forest overstory ( $LAI_o$ ) was calculated from the effective overstory LAI based on Eq. (2) using the global clumping index map derived from the MODIS BRDF product (He et al., 2012).

### 10 2.2.3 Calculation of the forest total LAI

The forest total LAI (GLOMAP  $LAI_T$ ,  $LAI_T$ ) was calculated by summing the forest overstory LAI and the understory LAI from the same month:

$$LAI_T = LAI_o + LAI_u \quad (9)$$

### 2.2.4 Estimation of the GLOBCARBON LAI

15 The LAI was also retrieved from the MODIS land surface reflectance products MOD09A1 for the global forest areas based on the GLOBCARBON LAI algorithm (hereafter referred to as GLOBCARBON LAI) to evaluate the  $LAI_o$ ,  $LAI_u$  and  $LAI_T$ . In the GLOBCARBON LAI algorithm, the constant background SR value of 2.4 is used for all forest types without consideration of the spatial and seasonal variations of the forest background (Deng et al., 2006). This constant background SR value is based on field measurements from boreal forests in Canada, which includes effects due to green mosses and the understory (Chen et al., 2002). It does not differentiate forest LAI between overstory and understory. The GLOBCARBON LAI is approximately equal to the forest total LAI with some of the effects due to the forest understory considered (Deng et al., 2006).

## 3 Results

### 3.1 Sensitivity analysis of forest understory vegetation composition

25 In the GLOBCARBON LAI algorithm, the non-forest vegetation is combined into two biomes, including shrub and grass/crop/other vegetated surfaces. Different algorithm coefficients are utilized for each biome type based on separate 4-Scale simulations. Since it is challenging to acquire the composition of understory vegetation at global scale, the understory LAI was calculated by averaging the LAI retrievals from MISR background reflectivity based on GLOBCARBON LAI

algorithm for shrub and grass/crop/other vegetated surfaces (here referred as grass algorithm). In fact, the structure of understory vegetation is usually complex and spatially disparate rather than half shrubs and half other non-forest vegetation (Peltoniemi et al., 2005). Thus, the smaller the difference of the understory LAI retrieved based on the algorithm between shrub ( $LAI_{u,shrub}$ ) and grass ( $LAI_{u,grass}$ ) is, the less sensitive the  $LAI_u$  is to the composition of understory vegetation, which may result in less uncertainties in derived  $LAI_u$ . In this section, the difference between  $LAI_{u,shrub}$  and  $LAI_{u,grass}$  was calculated to evaluate the sensitivity of derived  $LAI_u$  to forest understory vegetation composition for global evergreen needleleaf forests (ENFs), deciduous needleleaf forests (DNFs) and deciduous broadleaf forests (DBFs).

Figure 2 shows the distribution of differences between  $LAI_{u,grass}$  and  $LAI_{u,shrub}$  for global ENFs, DNFs, DBFs and all these three types of forests combined. The two LAI results are close to each other with the difference concentrated around zero and 82% (94%) of values lies within  $\pm 0.2$  ( $\pm 0.3$ ).  $LAI_{u,grass}$  is slightly greater than  $LAI_{u,shrub}$  for most forest pixels. The annual mean difference is of 0.11 for global forests except EBFs, and DBFs show slightly larger difference (0.12) than ENFs (0.09) and DNFs (0.11).

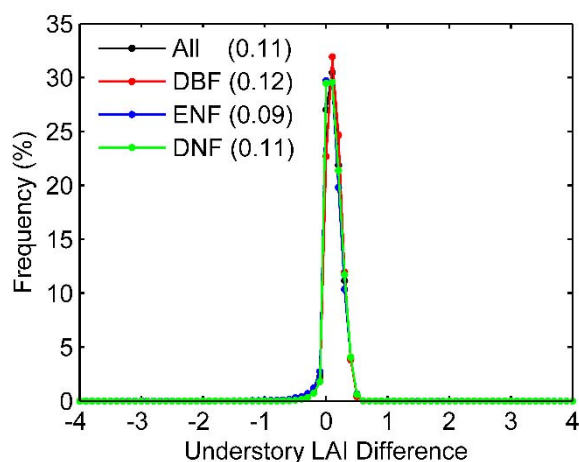

**Figure 2. Frequency of differences of derived understory LAI based on GLOBCARBON algorithm between shrub and grass**

Figure 3a and 3b refer to the temporal profiles of monthly mean difference between  $LAI_{u,grass}$  and  $LAI_{u,shrub}$  for various forest types in the northern and southern hemispheres, respectively. Disparity in seasonal curves of the mean difference is presented for various forest types and the two hemispheres. Generally, the difference is relatively larger in summer. In the northern hemisphere, the difference is less than 0.10 due to the sparse understory vegetation from January to March. It starts to increase sharply due to the growth of the understory vegetation from April, and reaches the maximum values during May and June with mean difference ranging from 0.20 to 0.28. Then, the difference decreases with the flourishing of overstory canopy, and the value is reduced to less than 0.10 from October to December. The three forest types show noticeable discrepancy in seasonal curve of mean differences. In June and July, the mean difference for DNFs (around 0.25) is larger than that of ENFs (around 0.22), while DBFs show smallest differences with values around 0.19. In contrast, it is generally

larger for DBFs than that for needleleaf forests. Large difference is concentrated in June in DNFs, with the largest monthly mean difference up to 0.28.

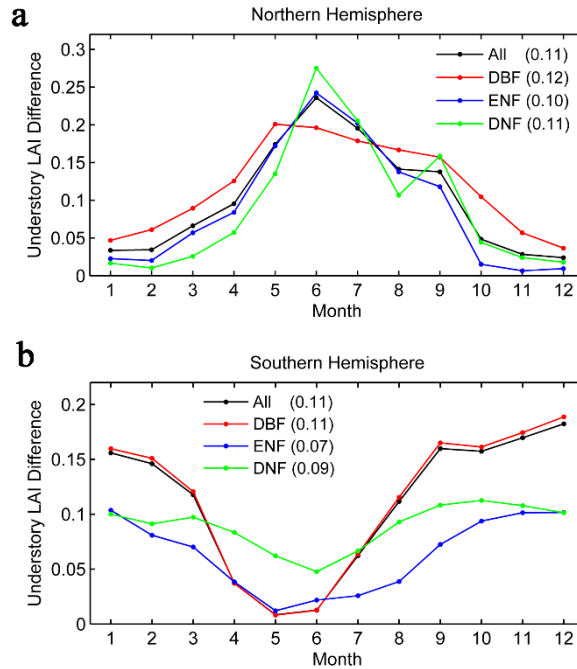

5 **Figure 3. Differences of derived understory LAI based on GLOBCARBON algorithm between shrub and grass: (a) the northern hemispheres; (b) the southern hemispheres.**

In the southern hemisphere, the mean difference is generally smaller than in the northern hemisphere. The area of forests is much smaller, especially for needleleaf forests. For ENFs and DNFs, the monthly mean difference is generally below 0.10. For DBFs, the mean difference between  $LAI_{u,shrub}$  and  $LAI_{u,grass}$  shows significant seasonal variations with the opposite seasonal curve compared to the northern hemisphere. Large mean difference is present from August to March, with most monthly mean difference ranging from 0.12 to 0.19. The maximum monthly mean difference appears in December (0.19). The monthly mean difference decreases below 0.06 from April to July, and reaches the minimum (0.01) in May.

### 3.2 Global distribution of forest overstory and understory LAI

The monthly  $LAI_u$  was estimated from the MISR monthly background reflectivity over the global needleleaf and DBFs area at a spatial resolution of 1 km, and the 8-day  $LAI_o$  was retrieved from the MODIS land surface reflectance data MOD09A1 from 2008 to 2010 at a spatial resolution of 500 m. Pixels influenced by snow and ice in  $LAI_o$  maps were excluded by using MOD09A1 state flag, and the cloudy pixels were also labeled by a cloud detection procedure (Liu and Liu, 2013).

Figure 4 shows the global distribution of  $LAI_u$  for each month, and Fig. 5 presents global  $LAI_o$  maps from 2010. Significant spatial and seasonal variations are presented for forest understory and overstory LAI. Forest understory is mostly found in boreal forest zones in the northern latitudes ( $50^\circ N$  to  $70^\circ N$ ), especially in summer. In July, 84% of the valid retrievals are

concentrated in this zone, and this percentage is still up to 54% in January, when much of the understory vegetation disappears or is covered by snow. The LAI retrievals are sparse for the southern latitudes (23.5° S to 63.0° S), where the forest area represents only approximately 4% of global forests. Only 2% of the valid LAI<sub>u</sub> retrievals are found in this region in July, and this percentage is less than 7% even in January. The LAI<sub>u</sub> values mainly range from 0 to 3, with most values occurring in the range 0-1. It could be up to 2-3 in July and August in boreal forests. Notable seasonal variations are found for LAI<sub>u</sub>, especially for boreal forests at high latitudes in the northern hemisphere. In this region, the LAI<sub>u</sub> is mainly less than 0.5 from November to April. Its value increases starting in May and reaches approximately 1.0 in May with a maximum value of up to 2-3 from June to August. Then, the values decrease in September and are below 1.0 in October. These seasonal variations also demonstrate the importance of seasonal forest background reflectivity in LAI retrieval.

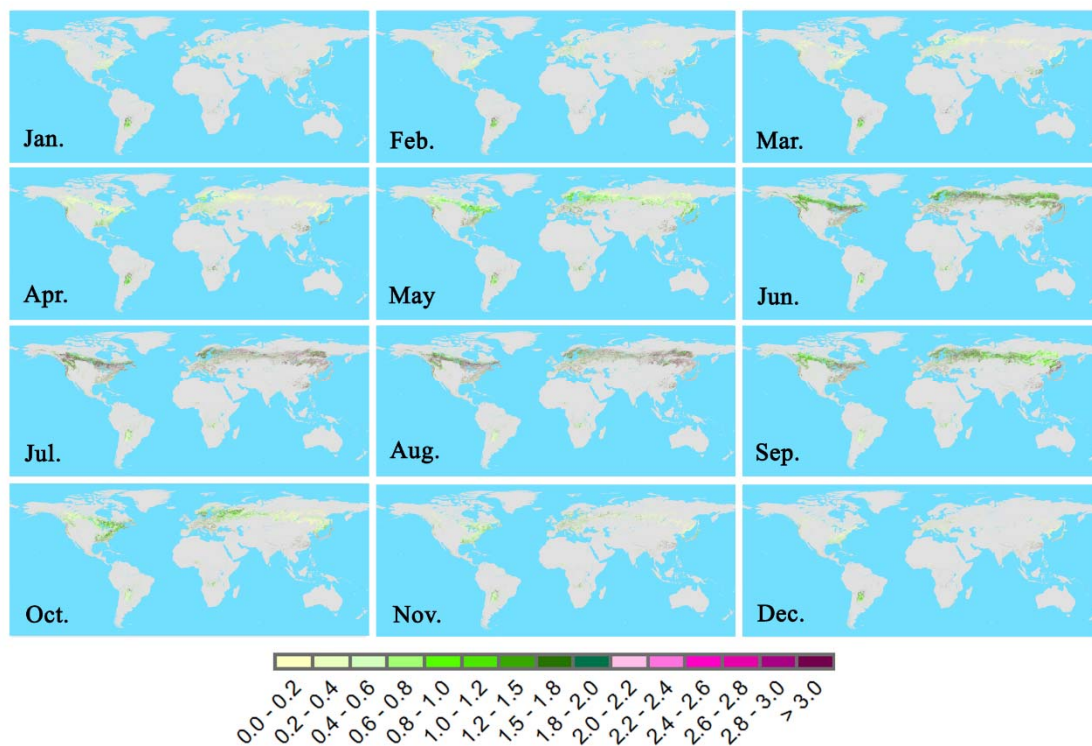

10

**Figure 4. Global monthly GLOBMAP forest understory LAI maps. Because notable uncertainties in the retrieved understory LAI are introduced for EBFs in the tropical zones due to the unreliability of the forest background reflectivities in this biome, the results from EBFs are excluded.**

The spatial and seasonal patterns of the LAI<sub>o</sub> are close to that of the forest total LAI, suggesting that overstory is the dominant component of forest LAI. Compared with the southern latitudes, the seasonal variations in LAI<sub>o</sub> are much more pronounced in the region of 30° to 70° N, where deciduous forests are widely distributed. The LAI<sub>o</sub> is approximately 0 from November to March due to snow covers, and its maximum value is greater than 4.0 from June to August. In the southern latitudes (23.5° to 63.0° S), the valid retrievals of the LAI<sub>o</sub> are sparse with inconspicuous seasonal variations due to the small forest area.

The average values of the monthly  $LAI_u$  and 8-day  $LAI_o$  (2008-2010) were mapped for global needleleaf and DBFs pixels, and the  $LAI_u$  and  $LAI_o$  patterns were examined along the latitude and longitude ranges. Figure 6 shows the mean LAI maps for the forest overstory and understory, as well as the latitudinal and longitudinal distributions of the mean LAI values for these two layers. The mean  $LAI_u$  is around 1.0 for most forests area studied, while  $LAI_o$  shows significant spatial variations with mean value ranging from 1.5 to 4.0. Both  $LAI_u$  and  $LAI_o$  show notable variations with latitude but having different patterns. For the overstory, the  $LAI_o$  decreased overall with increasing of latitudes in the northern hemisphere from 30° N to 80° N, which may be attributed to the decrease in the solar radiation and differences in the forest types, which are also primarily determined by the local climate. Between 25° N and 35° N, the mean  $LAI_o$  reaches above 3.0 due to the dense forests in southern China and southeastern America. For the understory, the mean  $LAI_u$  for boreal forests is around 1.0. The large  $LAI_u$  values are concentrated in DBFs and mixed forests in southeastern China with  $LAI_u$  up to above 1.5 even 2.0, which forms a peak at subtropical latitude between 25° N and 30° N. The other  $LAI_u$  peak is presented in the boreal region (55° N to 65° N), where the  $LAI_u$  ranges from 1.0 to 1.2. At southern latitudes (23.5° S to 63.0° S), both  $LAI_o$  and  $LAI_u$  show unstable variations with latitude, which may be associated with the sparse distribution of forests. Between 15° S and 25° S, small peaks are also presented for  $LAI_o$  (2.0-2.8) and  $LAI_u$  (1.0-1.5) due to relatively dense distribution of forests. In contrast to different patterns of  $LAI_o$  and  $LAI_u$  along the latitudinal direction, a similar pattern of these two LAI datasets is shown along the longitudinal direction. The mean  $LAI_o$  (2.0-2.8) and  $LAI_u$  (1.0-1.5) are relatively stable for regions with forests widely distributed, including north and south America between 130° W and 60° W with  $LAI_o$  up to 2.5 to 3.0 and  $LAI_u$  ranging 0.8 to 1.0, and Eurasia between 10° E to 140° E with  $LAI_o$  around 2.0 and  $LAI_u$  around 1.0. Unstable variations are also shown in several longitudinal regions that have sparse forest coverages, such as 137° W-180° W, 10° W-40° W and 150° E-180° E. Since EBFs have been excluded, neither  $LAI_o$  nor  $LAI_u$  shows stable and distinct peaks in the tropical zone.

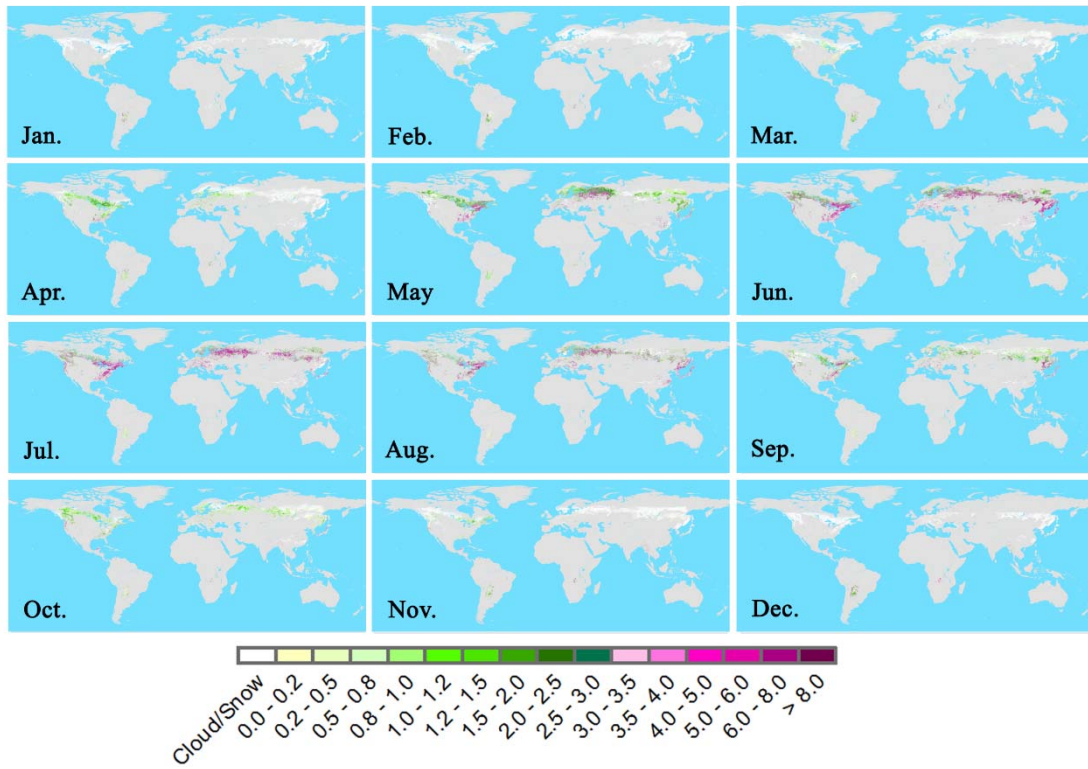

**Figure 5.** Global monthly GLOBMAP forest overstory LAI maps in 2010, with DOY001 for Jan., DOY041 for Feb., DOY073 for Mar., DOY105 for Apr., DOY137 for May, DOY169 for Jun., DOY185 for Jul., DOY225 for Aug., DOY249 for Sep., DOY281 for Oct., DOY313 for Nov., and DOY345 for Dec. The results from EBFs are excluded.

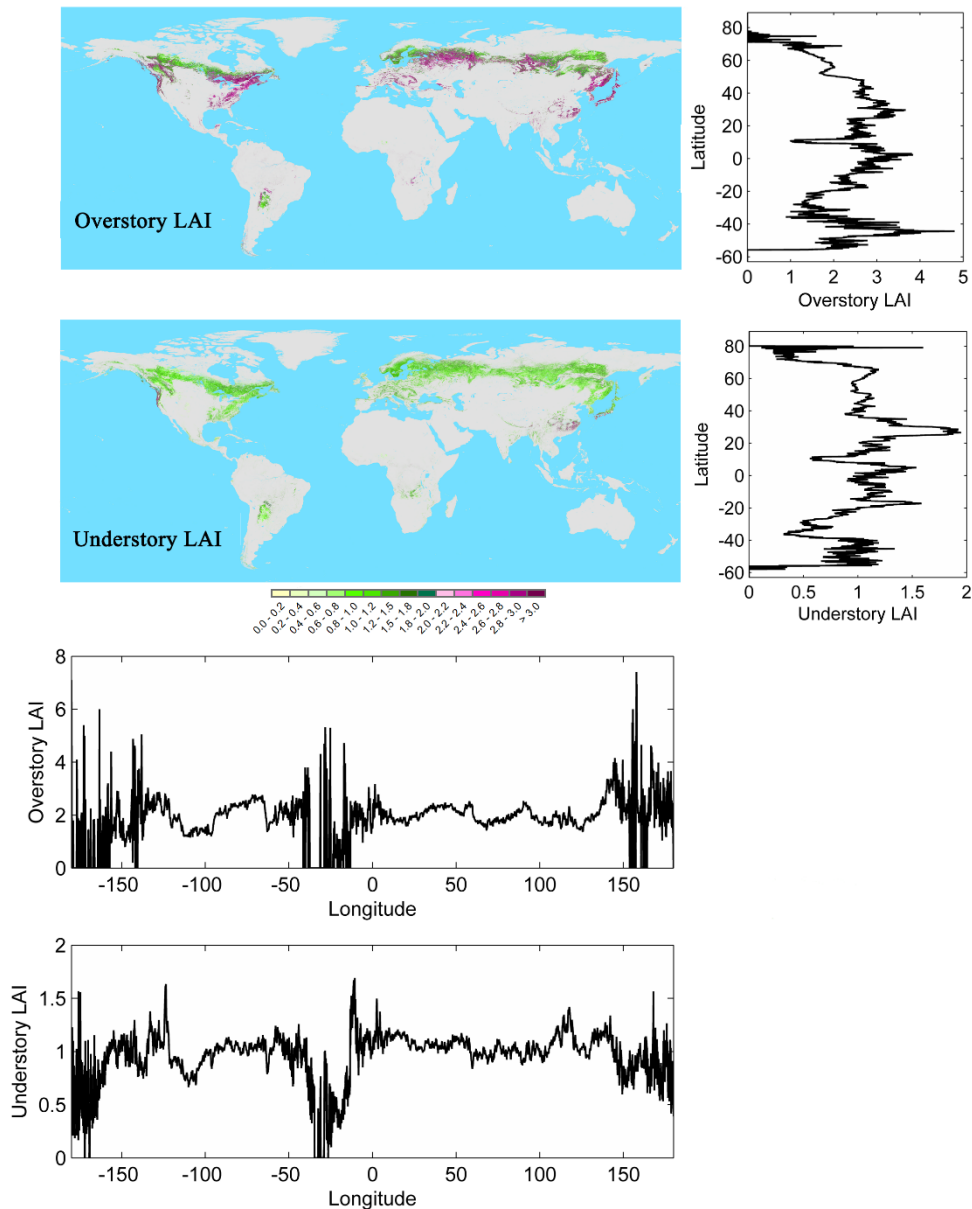

**Figure 6. Global mean GLOBMAP LAI for the forest overstory (2008-2010) and understory, as well as the latitudinal and longitudinal distributions of the mean LAI values for the forest overstory and understory.**

### 3.3 Distribution of overstory and understory LAI for different forest biomes

- The  $LAI_o$  and  $LAI_u$  values were compared for three major forest types, including ENFs, DNFs and DBFs. The histograms and mean values of monthly  $LAI_u$  and 8-day  $LAI_o$  (2008-2010) were analyzed over the global forest area for each forest type. Pixels influenced by clouds and snow were excluded.



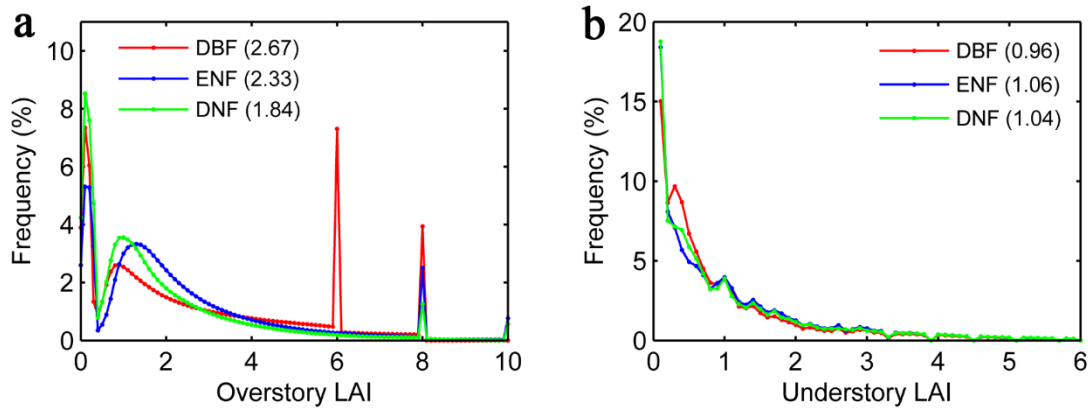

**Figure 7. Histograms of the GLOBMAP overstory and understory LAI over the global forest area. (a) Forest overstory LAI (2008-2010) and (b) forest understory LAI.**

5 Figures 7a and 7b show histograms of the  $LAI_o$  and  $LAI_u$ , respectively. Due to the different geographic distributions, climate and vegetation compositions, the  $LAI_o$  and  $LAI_u$  show differences for various forest types. For the forest overstory, the LAI values range from 0 to 10, with the majority concentrated in the range of 0-8. Broadleaf forests have more high values for  $LAI_o$  than needleleaf forests. The percentage with  $LAI_o$  above 3 is up to 37% for DBFs, while this percentage is 27% and 19% for ENFs and DNFs, respectively. The mean value of the  $LAI_o$  is also larger for DBFs (2.67) than for ENFs (2.33) or DNFs  
 10 (1.84). This result is mainly attributed to its short growing season and the low solar radiation at high latitudes, where DNFs are mainly distributed. There are many  $LAI_o$  values concentrated at 6, 8 and 10, especially for DBFs, which are the saturation values for dense forests in the summer set in the LAI algorithm (Deng et al., 2006).

For the forest understory, the LAI values are smaller than those for the overstory; most  $LAI_u$  values are in the range from 0.0 to 3.0. In contrast to  $LAI_o$ , the needleleaf forests have more high values for  $LAI_u$  than the DBFs; 19% of  $LAI_u$  values are  
 15 above 1.5 for DBFs, while this percentage is 24% for ENFs and 23% for DNFs. The mean value of the global  $LAI_u$  is also larger for needleleaf forests (1.06 for ENFs and 1.04 for DNFs) than for DBFs (0.96). This result is probably attributed to the more clumped foliage of the needleleaf forests (Chen et al., 1997), leading to more radiation penetrating through the canopy than for the less clumped broadleaf forests, which is favorable for the growth of understory vegetation (Gower et al., 1999). In addition, the signals from the understory vegetation may be relatively easier to observe by satellite sensors for highly  
 20 clumped needleleaf forests.

### 3.4 Seasonal variations of the forest overstory and understory LAI

The temporal profiles for  $LAI_o$  and  $LAI_u$  for the DBFs, ENFs and DNFs in the northern hemisphere are presented in this section to further evaluate these products. For each forest type,  $LAI_u$  was averaged for each month, and  $LAI_o$  was averaged  
 for each 8-day during the period of 2008-2010. These mean LAI values were then used to generate the seasonal curves. The  
 25 results for the northern hemisphere are presented in this section, where the majority of forests in the world are found.

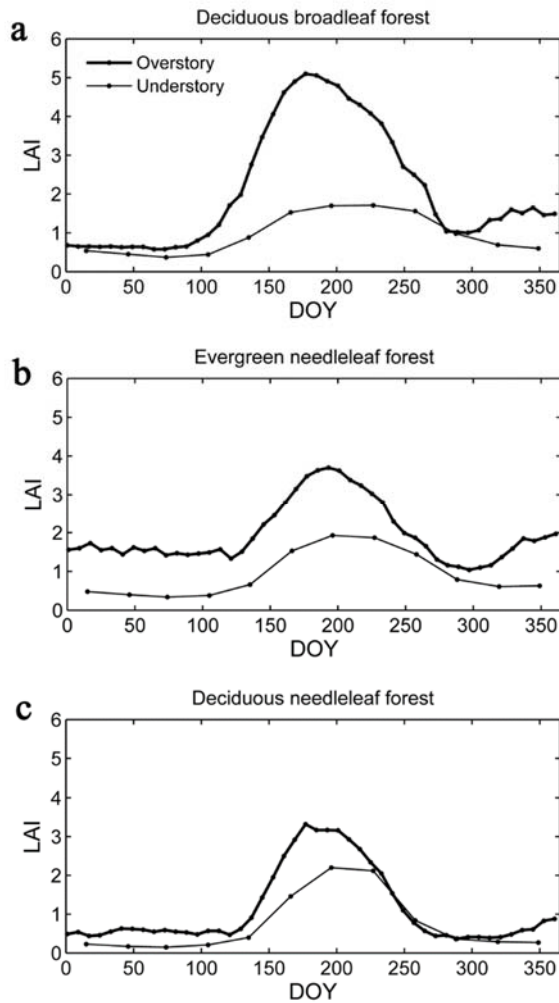

**Figure 8. Time series of the GLOBMAP overstory (thick lines) and understory (thin lines) LAI for a) DBFs, b) ENFs, and c) DNFs in northern hemisphere.**

Figure 8 shows time series of the overstory (thick lines) and understory (thin lines) LAI, and Table 3 presents monthly mean values for the  $LAI_o$  and  $LAI_u$  for the three forest types. Significant seasonal variations of the  $LAI_o$  and  $LAI_u$  are presented for all three forest types, and the shapes of the curves are similar between the  $LAI_o$  and  $LAI_u$  for each type. The differences in the magnitude of the seasonal variations and the lengths of the growing seasons are presented for three types. For the  $LAI_o$ , DBFs show a larger magnitude of seasonal variation and a longer growing season than needleleaf forests, with  $LAI_o$  values approximately 0.6 from November to March and up to more than 4.5 in June and July. For ENFs, the  $LAI_o$  values in the summer (approximately 3.0) are smaller than those of broadleaf forests. Although the  $LAI_o$  values for ENFs are larger than those of deciduous forests in the winter, the values are still below 2.0, which is probably due to the low sensitivity of satellite measurements in the red and NIR bands to the canopy LAI as a result of the decrease in the foliage chlorophyll in the winter.

The magnitude of the seasonal variations is also smallest for DNFs compared to the other two forest types, where the LAI<sub>o</sub> is only approximately 3.0 in July. Because DNFs are usually found at high latitudes or on mountains with low temperatures and precipitations, the lengths of the growing seasons for DNFs are generally shorter than those of DBFs and ENFs.

**Table 3. Monthly mean GLOBMAP LAI for the overstory and understory of three major forest types in the northern hemisphere, including DBFs, ENFs and DNFs.**

|      |                  | Jan. | Feb. | Mar. | Apr. | May  | Jun. | Jul. | Aug. | Sep. | Oct. | Nor. | Dec. |
|------|------------------|------|------|------|------|------|------|------|------|------|------|------|------|
| DBFs | LAI <sub>o</sub> | 0.60 | 0.65 | 0.62 | 0.91 | 2.41 | 4.56 | 4.72 | 3.91 | 2.51 | 1.02 | 0.78 | 1.04 |
|      | LAI <sub>u</sub> | 0.54 | 0.45 | 0.37 | 0.44 | 0.88 | 1.53 | 1.70 | 1.71 | 1.56 | 0.98 | 0.69 | 0.60 |
| ENFs | LAI <sub>o</sub> | 1.77 | 1.42 | 1.36 | 1.44 | 1.76 | 2.80 | 3.32 | 2.81 | 1.77 | 1.09 | 1.03 | 1.96 |
|      | LAI <sub>u</sub> | 0.48 | 0.40 | 0.34 | 0.38 | 0.66 | 1.53 | 1.93 | 1.87 | 1.44 | 0.79 | 0.61 | 0.63 |
| DNFs | LAI <sub>o</sub> | 0.50 | 0.64 | 0.56 | 0.64 | 0.98 | 2.54 | 2.90 | 2.22 | 1.18 | 0.42 | 0.48 | 0.75 |
|      | LAI <sub>u</sub> | 0.23 | 0.17 | 0.15 | 0.21 | 0.40 | 1.46 | 2.20 | 2.12 | 0.84 | 0.36 | 0.29 | 0.27 |

The seasonal curves for LAI<sub>u</sub> are similar to those for LAI<sub>o</sub> with smaller magnitudes. In contrast to the forest overstory, the needleleaf forests understory shows higher LAI values (up to 2.2 for DNFs and 1.9 for ENFs in July) than that for broadleaf forests (1.7 for DBFs) in the summer, thus presents larger seasonal variation than that of broadleaf forests, especially for DNFs. The mean proportion of understory LAI to total LAI is 36% for DBFs, which is slightly larger than that for DNFs (34%) and ENFs (31%). Differences in the lengths of the growing seasons for LAI<sub>u</sub> are also found for various forest types due to their geographic distributions, climates and vegetation compositions, which is similar to the forest overstory.

### 3.5 Seasonal effects of the background reflectivity on the LAI retrieval

The GLOBMAP LAI<sub>T</sub> was generated by summing LAI<sub>o</sub> and LAI<sub>u</sub> in the same month from 2008 to 2010, and the difference between the GLOBCARBON LAI and the GLOBMAP LAI<sub>T</sub> was calculated over the global forest area to evaluate the effects of monthly pixel-specific forest background reflectivity on forest LAI retrieval.

Figure 9a shows a map of the difference between the GLOBCARBON LAI and the GLOBMAP LAI<sub>T</sub> over the global forest area. The difference is negative for most forest pixels. This is probably because some forest understory effects have been considered in the GLOBCARBON LAI by using the constant background SR value of 2.4 (Deng et al., 2006), while the GLOBMAP LAI<sub>T</sub> includes the LAI for all forest canopy and understory vegetation. Because the standard background SR value (2.4) is based on field measurements in boreal forests in Canada, which includes green mosses and the understory (Chen et al., 2002), the difference is smaller in the boreal forests at high northern latitudes, especially in Canada, with LAI differences within -0.5~0 for most pixels. This difference is larger for broadleaf forests, with LAI differences of up to -1.0, suggesting that the standard background SR in the GLOBCARBON LAI algorithm is more suitable for boreal forests. Yearly mean differences and standard deviations (STDs) for the three forest types over the global forest area are presented in Table 4. The difference between GLOBCARBON LAI and the LAI<sub>T</sub> is small for needleleaf forests, with a yearly mean difference of -0.48 for ENFs and -0.59 for DNFs, while this difference is larger for DBFs (-0.68). Figure 10a shows monthly mean

differences and STD series in the northern hemisphere. The difference varies for each month for the three forest types. It ranges from 0.0 to -0.5 from November to April, while this difference is larger in the summer, with values of up to -0.8 for ENFs, -1.3 for DNFs and DBFs in July and August.

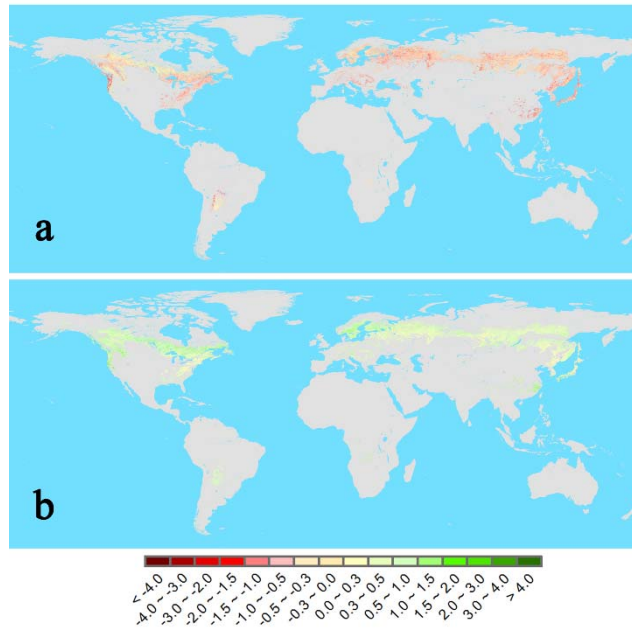

5 **Figure 9.** Maps of the differences between (a) the GLOBCARBON LAI and the GLOBMAP forest total LAI (sum of the overstory and understory LAI) and (b) the GLOBCARBON LAI and the GLOBMAP forest overstory LAI. The results for the EBFs are excluded.

In addition, the difference between the GLOBCARBON LAI and the GLOBMAP LAI<sub>o</sub> was calculated over the global forest area from 2008 to 2010. Figure 9b shows a map of the differences between the GLOBCARBON LAI and the GLOBMAP LAI<sub>o</sub> over the globe. Figure 10b shows the monthly mean difference and STD series in the northern hemisphere, and Table 4 shows the yearly mean differences and STD for three forest types over the global forest area. The difference is positive for most forest pixels, which is attributed to the partial signals of understory still included in the GLOBCARBON LAI. Because the difference mainly represents signals from the forest understory, it is also larger for needleleaf forests than broadleaf forests due to their more clumped foliage, especially in the boreal forest zones (Fig. 9b), with yearly mean differences of 0.62 for ENFs, 0.43 for DNFs and 0.35 for DBFs. Notable seasonal variations are also found for the three forest types (Fig. 10b). It is smaller from November to April with a mean difference within 0.4, while it is larger for needleleaf forests during the growing season, with mean differences up to approximately 1.0 for ENFs, 0.8 for DNFs and 0.4 for DBFs from June to August.

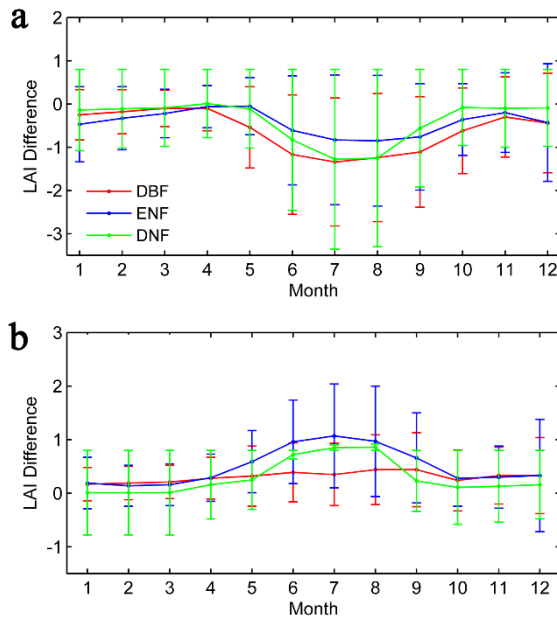

**Figure 10. Monthly mean differences between (a) the GLOBCARBON LAI and the GLOBMAP LAI<sub>T</sub> (sum of the overstory and understory LAI) and (b) the GLOBCARBON LAI and the GLOBMAP LAI<sub>o</sub> over the global forest area in the northern hemisphere from 2008 to 2010.**

**5 Table 4. Yearly means and standard deviations (STDs) of the differences between the GLOBCARBON LAI and the GLOBMAP LAI<sub>T</sub> and between the GLOBCARBON LAI and the GLOBMAP LAI<sub>o</sub> over the global forest area from 2008 to 2010.**

|                                         |      | DBFs  | ENFs  | DNFs  |
|-----------------------------------------|------|-------|-------|-------|
| GLOBCARBON LAI-GLOBMAP LAI <sub>T</sub> | Mean | -0.68 | -0.48 | -0.59 |
|                                         | STD  | 0.59  | 0.67  | 1.39  |
| GLOBCARBON LAI-GLOBMAP LAI <sub>o</sub> | Mean | 0.35  | 0.62  | 0.43  |
|                                         | STD  | 0.31  | 0.41  | 0.37  |

The forest understory vegetation and soil background vary with forest type, site and season. Notable uncertainties would be introduced if a constant background were used in the LAI retrieval. The GLOBCARBON LAI products remove partial effects of the forest background, leading to the differences between the GLOBCARBON LAI products and the GLOBMAP LAI<sub>T</sub> as well as the LAI<sub>o</sub>. These differences vary with the forest type, geographic location and season. Due to the different roles of the overstory and understory layers, uncertainties will be introduced into the estimation of the forest water and carbon cycle (Chen et al., 1999). This problem also exists for other LAI products, which do not separate these two layers for forests. Pixel-specific seasonal forest background reflectivity helps to account for the effects of the forest background on the LAI retrieval.

### 3.6 Comparison with the overstory and understory LAI of larch forests in Northern Eurasia

In this section, the derived  $LAI_o$  and  $LAI_u$  were compared with an existing overstory and understory LAI dataset, which was estimated for the larch forest with understory vegetation mainly composed with evergreen shrubs such as cowberry and other deciduous species covering eastern Siberia ( $40^{\circ}$ - $75^{\circ}$  N,  $45^{\circ}$ - $180^{\circ}$  E) (Kobayashi et al., 2010). This understory LAI dataset (Kobayashi  $LAI_u$ ) was derived through the relationship with the normalized difference water index (NDWI) on the day of leaf appearance. The overstory LAI dataset (Kobayashi  $LAI_o$ ) was estimated from the relationships between the overstory LAI and the seasonal increases in the NDWI after leaf appearance. The algorithm was applied to SPOT/VGT observations and produced understory and overstory LAI for the larch forests over Northern Eurasia with the resolutions of  $1/112^{\circ}$  in geographic coordinates. The forest understory LAI was estimated from the forest background reflectivities on leaf appearance day, which was provided in Kobayashi datasets, from 2005 to 2009 using the algorithm in this paper, and it was compared with the Kobayashi  $LAI_u$ . The GLOBMAP  $LAI_o$  is compared with the Kobayashi  $LAI_o$  from 2008 to 2009. The GLOBMAP  $LAI_u$  and  $LAI_o$  were resampled to the spatial resolution of  $1/112^{\circ}$  and converted to the same geographic coordinates as the Kobayashi dataset. For each pixel, the GLOBMAP  $LAI_o$  and  $LAI_u$  was matched with the Kobayashi datasets at the corresponding location and the nearest observational dates to perform a pixel-to-pixel comparison. Those pixels only labeled as DNFs both in MCD12 and GLC2000 were used. Figure 11 shows the density scatter plots of the two LAI datasets, and the statistical analysis results are shown in Table 5. For understory LAI, both datasets are concentrated in LAI ranges of 0.0-1.0. The comparison shows good agreement with a high density of points dispersed along the 1:1 line and a root mean square error (RMSE) of 0.29. The mean GLOBMAP  $LAI_u$  (0.48) is also close to that of Kobayashi  $LAI_u$  (0.42), leading to an absolute error of 0.06 and a relative error of 14.3%. For overstory LAI, the majority of the points are distributed in the range from 0.0 to 4.0, which represents the notable seasonal variations of the foliage in this DNFs. The area with the highest density (dark red) is also along the 1:1 line, especially in the LAI range from 0.0 to 3.0, which indicates that the majority of the GLOBMAP  $LAI_o$  agrees with the Kobayashi  $LAI_o$ . The mean value of the GLOBMAP  $LAI_o$  is 1.95, and this value is 1.61 for the Kobayashi  $LAI_o$ , resulting in an absolute error of 0.34 and a relative error of 21.1%. Relatively high densities are also found in the Kobayashi  $LAI_o$  of 4.0, which can probably be attributed to the relatively concentrated distributions of high LAI values in maximum values in the Kobayashi LAI algorithms. Some points with relatively low densities (blue) stray from the 1:1 line, and the mean value of the GLOBMAP  $LAI_o$  is slightly higher than that of the Kobayashi dataset, indicating that the Kobayashi  $LAI_o$  is slightly smaller than the GLOBMAP  $LAI_o$ . The maximum value of the Kobayashi  $LAI_o$  is 4.0 based on the statistics from 2008-2009, while the maximum value of the GLOBMAP  $LAI_o$  is 10.0, with the majority in the range from 0.0 to 6.0. To avoid the influence from this difference, a statistical analysis was performed using only the pixels with overstory LAI ranging 0.0 to 4.0 for the two datasets. Table 5 shows the new results. The mean values of the overstory LAI for the GLOBMAP  $LAI_o$  (1.53) and the Kobayashi  $LAI_o$  (1.51) are very similar, with an absolute error of 0.02 and a relative error of 1.3%. In addition, the RMSE decreased from 1.42 to 0.93.

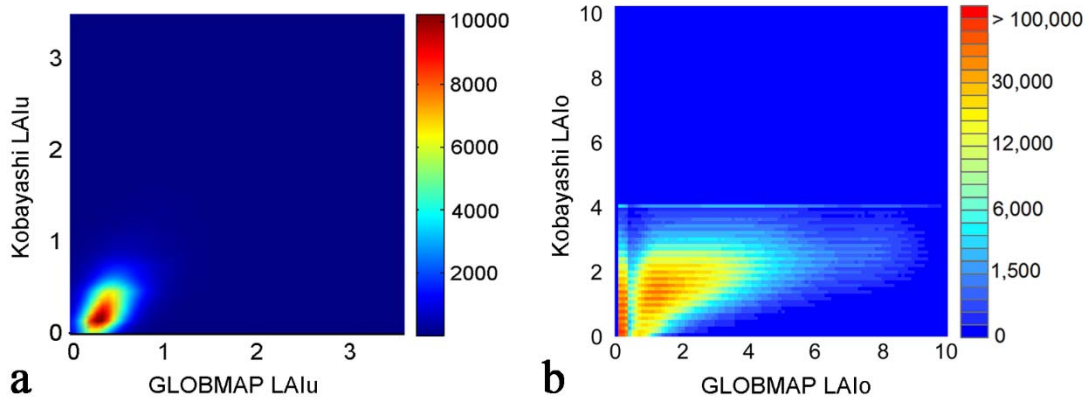

**Figure 11.** Comparison between the GLOBMAP LAI<sub>o</sub> and LAI<sub>u</sub> with the Kobayashi datasets (Kobayashi et al., 2010) over the larch forest region in North Asia: (a) Understory LAI and (b) Overstory LAI.

**Table 5.** Pixel-by-pixel comparison of the GLOBMAP LAI<sub>o</sub> and LAI<sub>u</sub> with the Kobayashi datasets (Kobayashi et al., 2010) over the larch forest in Northern Eurasia.

|            | LAI Range | Linear regression   | LAI Mean  |      |
|------------|-----------|---------------------|-----------|------|
| Understory | 0-6       | $y=0.5114x+0.1774$  | GLOBMAP   | 0.48 |
|            |           | RMSE=0.29, $r=0.51$ | Kobayashi | 0.42 |
| Overstory  | 0-10      | $y=0.2549x+1.1113$  | GLOBMAP   | 1.95 |
|            |           | RMSE=1.42, $r=0.51$ | Kobayashi | 1.61 |
|            | 0-4       | $y=0.3412x+0.9833$  | GLOBMAP   | 1.53 |
|            |           | RMSE=0.93, $r=0.46$ | Kobayashi | 1.51 |

### 3.7 Validation with field measurements

It is challenging to directly validate the satellite LAI products with spatial resolutions from several hundreds of meters to kilometers against ground measurements due to the uncertainties from scaling, heterogeneity, geolocation and the limited spatial and temporal sampling of ground data (Privette et al., 2000; Weiss et al., 2007). When it comes to the forest overstory and understory LAI, this work is even more challenging due to the lack of separate field measurements for these two layers, especially for understory LAI. In this section, the GLOBMAP LAI<sub>u</sub> and LAI<sub>o</sub> were compared with field LAI measurements extracted from related references at eight forest sites that cover major forest types except for EBFs. Additionally, the understory LAI (estimated field LAI<sub>u</sub>) values were also estimated from the field understory NDVI measurements (field NDVI<sub>u</sub>) at the seven sites (Table 2), and then compared with the GLOBMAP LAI<sub>u</sub>. The algorithms for shrub and for grass/crop/other vegetated surfaces were applied and the mean value of the two retrievals was used as understory LAI. To reduce the uncertainties from heterogeneity and geolocation, the LAI retrievals on 3×3 km pixels around the site were averaged and then compared with the ground data. For those field measurements that provide mean LAI for a month or a period of time, the mean values of LAI retrievals during these periods were calculated for comparison.

For forest understory, the LAI measurements at Prince Albert National Park, Canada (53.70° N, 106.20° W) in April to October from 2000 to 2003 were extracted from figures in Barr et al. (2007). The mean values of field understory LAI were calculated for each month from April to October and then compared with the monthly mean GLOBMAP LAI<sub>u</sub> at corresponding geolocations. Figure 12a shows the results of comparison. The plots are close to the 1:1 line, with a slope of 0.96 and an offset of 0.17. The R<sup>2</sup> is 0.62 and RMSE is 0.62. For forest overstory, the LAI measurements at eight sites from 2000 to 2013 were compared with the GLOBMAP LAI<sub>o</sub> derived from MOD09A1 land surface reflectance obtained in the nearest time periods. Figure 12b shows the comparison results for forest overstory LAI. GLOBMAP LAI<sub>o</sub> seems to slightly overestimate the ground data, with a slope of 1.22 and an offset of -0.07. The R<sup>2</sup> is 0.52 and RMSE is 1.36. The LAI<sub>o</sub> generally agrees well with the ground data for overstory LAI less than 2.0, with plots close to the 1:1 line. On contrary the differences between the LAI<sub>o</sub> and ground data increase when overstory LAI is greater than 2.0. Similarly, the differences between the LAI<sub>u</sub> and the field measurement are also smaller for understory LAI less than 1.5 than those approximately 2.0 (Fig. 12a). These results could be probably attributed to the larger uncertainties in reflectivities of the forest background for dense canopies (Jiao et al., 2014), which will affect the understory and overstory LAI retrieved for forest with high LAI values. In addition, the differences in temporal period for field measurements and satellite observation also affect the comparisons, especially for understory LAI which uses the multi-year average values.

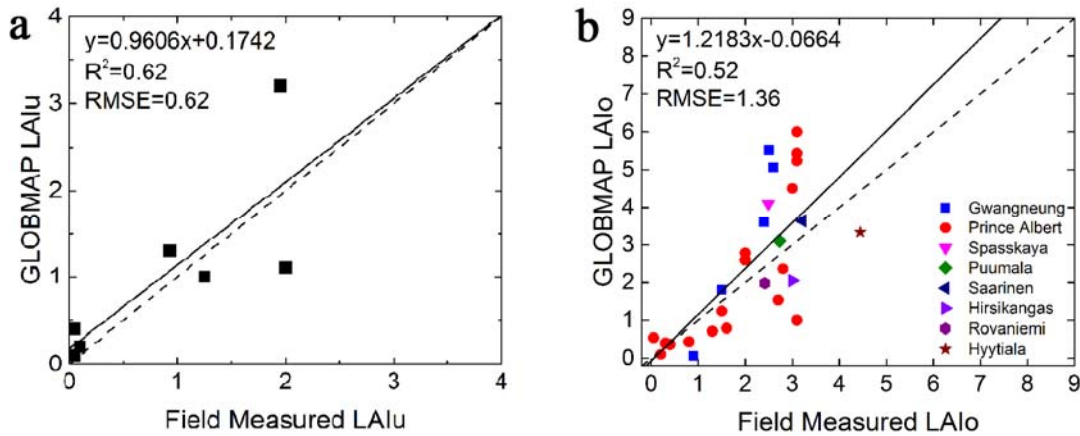

**Figure 12. Comparison of the GLOBMAP LAI<sub>u</sub> (LAI<sub>o</sub>) and ground LAI data: (a) results for understory LAI at Prince Albert National Park, Canada; (b) results for overstory LAI.**

Figure 13 presents the time series of GLOBMAP LAI<sub>u</sub>, field NDVI<sub>u</sub> and estimated field LAI<sub>u</sub> at seven forest sites. Generally, GLOBMAP LAI<sub>u</sub> shows reasonable seasonal curves, and is consistent well with the shapes of field NDVI<sub>u</sub> and estimated field LAI<sub>u</sub>. Notable seasonal variations are represented with GLOBMAP LAI<sub>u</sub>, which could characterize the seasonal curves of dominated deciduous understory vegetation at these sites except Laegern. At the northernmost boreal forest site PFRR (65.12° N, 147.5° W), the length of growing season for understory is short, with GLOBMAP LAI<sub>u</sub> greater than 1.0 only in June, July and August. The GLOBMAP LAI<sub>u</sub> overestimates the estimated field LAI<sub>u</sub> at this site. At the most southern site Sudbury (47.16° N, 81.76° W), although the overstory dominated species (black spruce) is the same as the PFRR, the



GLOBMAP LAI<sub>u</sub> is greater than 1.0 until October. Our result in July is very close to the estimated field LAI<sub>u</sub> in day of year (DOY) 177.

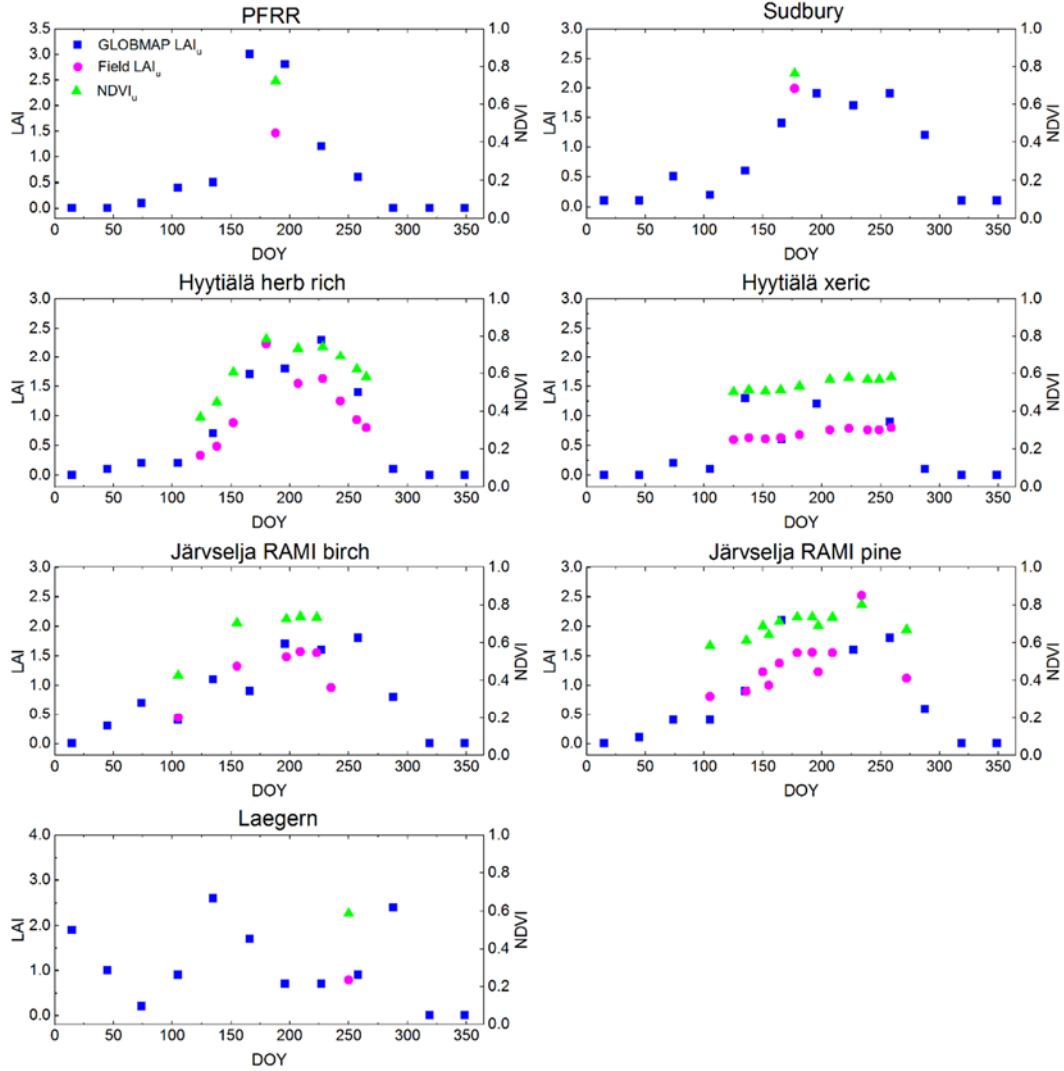

5 **Figure 13. Seasonal profiles of GLOBMAP LAI<sub>u</sub> (blue) and their comparison with in situ understory NDVI (NDVI<sub>u</sub>, green) measurements and estimated understory LAI from field NDVI<sub>u</sub> (Field LAI<sub>u</sub>, pink) in seven forest sites, including stands in PFRR, Sudbury, Hyytiälä herb rich, Hyytiälä xeric, Järvelja RAMI birch, Järvelja RAMI pine and Laegern.**

Hyytiälä Herb Rich (61.84° N, 24.32° E) and Hyytiälä Xeric (61.81° N, 24.33° E) are two southern boreal forest stations with dominant tree species of birches and Scots pine, respectively. The former is more fertile than the latter. Understory vegetation is dominated by herbaceous species and graminoids at the herb-rich site, while lichens and heather at the xeric  
 10 heath forest. At the Hyytiälä Herb Rich site, the GLOBMAP LAI<sub>u</sub> captures the seasonal curves represented by field NDVI<sub>u</sub>,

and the values are consistent well with estimated field  $LAI_u$ , with the  $LAI_u$  reaches approximately 2.0 in the summer. In contrast, at the Hyytiälä Xeric site, the  $LAI_u$  shows smaller variations with the values below 1.5 in the summer.

For the two hemiboreal forests sites Järvelja RAMI birch (58.28° N, 27.33° E) and RAMI pine (58.31° N, 27.30° E), the geolocations are more southern, and the understory vegetation is more abundant and host more species than in boreal Hyytiälä. The GLOBMAP  $LAI_u$  increases earlier and the values are still above 0.5 in October in the more southern Järvelja sites. As the complexity of the understory enhances the challenge of understory LAI retrieval, the seasonal series are not as smooth as that in Hyytiälä. Even so, the GLOBMAP  $LAI_u$  could capture the understory development in the spring and senescence in the fall, and its values are generally close to the estimated field  $LAI_u$ .

The Laegern site in Switzerland represents a temperate mixed forest. The overstory is dominated by very big European beech and Norway spruce, with effective LAI up to 5.5, mean tree height of 30.6 m and max crown radius greater than 10 m (see details in Pisek et al., 2016). The understory vegetation is sparse and consists mainly of *Allium ursinum*. Although the GLOBMAP  $LAI_u$  in September (0.9) is very close to the estimated field  $LAI_u$  in DOY 250, its time series does not appear stable during the whole year. This suggests that large uncertainties may exist in the retrieved understory and overstory LAI for such dense and closed canopy where the dominant scattering effect is shadowing, which has also been proved by Pisek et al. (2016).

#### 4 Discussion

Many factors affect the quality of the derived forest overstory and understory LAI. The MISR forest background reflectivity was used to estimate the forest understory LAI directly and correct for the effects of the background in the MODIS observations before the retrieval of the overstory LAI. Thus, the uncertainties in the MISR forest background reflectivity will be introduced into the results. It is pointed out that the tree architectural parameters used in 4-scale model and the land cover may affect the retrieved forest background reflectivity (Jiao et al., 2014), which will also affect the derived forest overstory and understory LAI. Additionally, the overstory and understory true LAI was converted from effective LAI retrievals with the global clumping index map derived from the MODIS BRDF product (He et al., 2012). Quality of this clumping index map would also affect our results.

The reliability of the retrieved LAI is different for various forest types and seasons. Generally, it is difficult for satellite sensors to capture signals of the understory through the dense canopies. The reflectivities of the forest background tend to be unrealistic for dense canopies with LAI greater than 4, so the understory LAI is more reliable for sparse forest, and the retrievals in the spring and autumn should be more reliable than those in the summer. In addition, it is easier for optical remote sensing to capture signals from understory vegetation for coniferous forests than for broadleaf forests due to the more clumped foliage of the needleleaf forests. In fact, the structure of forest is very complicated. The overstory and understory may be composed of several sublayers, and the young forests' canopy may be even continuous from ground to canopy-top. In order to characterize the forest vertical structure from remote sensing data at global scale, forest is simplified to two layers,

i.e. overstory and understory layers. Specifically, for EBFs, its vegetation structure is much more complex than any other forest type, making it difficult to clearly separate the canopy into overstory and understory. Besides, in the forest background reflectivity algorithm, EBFs share tree architectural parameters (such as stand density, tree height and tree stem diameter) with DBFs, which may introduce significant uncertainties into the background reflectivity in the tropical zones due to large differences between these two forest types. To avoid the influence of unconvincing forest background reflectivity, the EBFs were excluded in this study.

Forest understory has usually large species variation and heterogeneous spatial distribution. Besides, it is not entirely independent from the tree canopy since changes in canopy closure or tree layer LAI will lead to a change in the species composition and green LAI of ground vegetation (Rautianinen and Heiskanen, 2013). Generally, although the composition of understory is complex and site-dependent, the typical species are shrubs, grasses and other herbaceous plants, mosses and lichens (e.g., Deering et al., 1999; Maeno and Hiura, 2000; Peltoniemi et al., 2005; Liang et al., 2012; Ryu et al., 2014; Qi et al., 2014; Nikopensius et al., 2015). In this paper, the understory LAI is estimated by averaging the retrievals based on GLOBCARBON LAI algorithm for shrubs and grasses/crop/other non-forest vegetation. Thus, the complicated understory composition is simplified as shrubs and non-forest non-shrub vegetation. The retrieved understory LAI may be affected by the uncertainties of GLOBCARBON LAI algorithm for non-forest biomes. In addition, this simplification will also introduce uncertainties if the composition were not half shrubs and half other non-forest vegetation. Fortunately, the retrievals based on the algorithms for these two biomes are not quite different (Sect. 3.1). Therefore, this simplification enables us to characterize the vertical structures for global forest from optical remote sensing observations. Moreover, Lidar provides another powerful tool for monitoring forest vertical structures. For example, GLAS spaceborne waveform lidar data has been used to extract forest vertical foliage profile over the United States at the footprint level (Tang et al., 2016). Combination of Lidar and optical remote sensing may improve the forest structure monitoring.

It takes 9 days for MISR to acquire global coverage due to its relative narrow swath width of approximately 360 km. With influences of this low temporal resolution and occurrence of clouds, large proportion of missing data is presented in the MISR daily Land Surface Products (Liu et al., 2012b). As a result, there are large numbers of invalid retrievals in the daily forest background reflectivity derived from MISR observations (Jiao et al., 2014). To generate spatially coherent maps, we have to compose the monthly forest understory LAI using the daily retrieved results during the 11-year period from 2000 to 2010. Thus, the changes in the forest understory among years and within month are not considered in this paper. Recently, the background reflectivity has been retrieved from MODIS BRDF products with a temporal resolution of 8 days over selected sites (Pisek et al., 2012; 2016). Such BRDF products have high temporal resolutions, and should make it possible to account for the inter-annual and seasonal variations in the forest understory vegetation in the future.

## 5 Conclusions

In this paper, the forest LAI is separated into overstory and understory layers over the global deciduous broadleaf and needleleaf forest areas based on monthly 1-km MISR forest background reflectivity and MODIS land surface reflectance. The global monthly 1-km forest understory LAI (GLOBMAP LAI<sub>u</sub>) and 8-day 500-m forest overstory LAI (GLOBMAP LAI<sub>o</sub>) were retrieved.

Forest overstory is the dominant component of forest LAI, and its spatial and seasonal patterns are close to those of the forest total LAI. The forest understory is mainly found in the boreal forest zones in the northern latitudes (40° to 70°N), where 84% of global valid retrievals are found in July. Significant seasonal variations of the LAI<sub>u</sub> are present in this region, with LAI up to 2-3 from June to August. Needleleaf forests have more high values of LAI<sub>u</sub> than broadleaf forests, and its mean value (1.06 for ENFs and 1.04 for DNFs) is also larger than those for DBFs (0.96) due to its more clumped foliage. As a result of the differences in geographic distribution, climate and vegetation composition, the seasonal LAI<sub>o</sub> and LAI<sub>u</sub> curves change for various forest types. For forest overstory, the magnitude of seasonal variations is larger for DBFs than those of DNFs and ENFs. In contrast, for forest understory, needleleaf forests show larger seasonal variations than broadleaf forests, with higher LAI<sub>u</sub> values in the summer. The retrieved LAI<sub>o</sub> and LAI<sub>u</sub> values were compared with the Kobayashi datasets, which were derived from SPOT/VGT observations based on three-dimensional radiative transfer simulations for larch forests in eastern Siberia. The mean GLOBMAP LAI<sub>u</sub> (0.48) and LAI<sub>o</sub> (1.95) are close to that of Kobayashi LAI<sub>u</sub> (0.42) and Kobayashi LAI<sub>o</sub> (1.61), leading to an absolute error of 0.06 (0.34), relative error of 14.3% (21.1%) and RMSE of 0.29 (0.93). The LAI<sub>u</sub> and LAI<sub>o</sub> were also validated against field measurements. The R<sup>2</sup> is 0.62 and 0.52, and the RMSE is 0.62 and 1.36 for understory and overstory LAI, respectively. And the derived LAI<sub>u</sub> is consistent well with field understory NDVI measurements and estimated understory LAI over different forest types. The retrieved results show better consistency with the ground data for forest with lower LAI, while it is hard to separate the understory signal from the overstory for dense and closed canopies.

The forest understory vegetation and soil background vary with forest type, geographic location and season. Uncertainties would be introduced if constant forest backgrounds were employed in the estimation of the forest LAI, as in the GLOBCARBON LAI. Comparison between the GLOBMAP LAI<sub>T</sub> and the GLOBCARBON LAI shows significant variations in the difference between these two LAI dataset among forest types and seasons. The difference is smaller for needleleaf forests than broadleaf forests, with a yearly mean difference of -0.48 for ENFs, -0.59 for DNFs and -0.68 for DBFs, which is probably because the constant forest background SR value was estimated from field measurements of boreal forests in Canada. The difference is smaller from November to April (-0.5~0) than in the summer (up to -0.8 for ENFs, -1.3 for DNFs and DBFs in July and August).

It is challenging to separate the LAI for forest canopy and understory vegetation at the global scale. In this paper, with the aid of forest background reflectivity derived from MISR multi-angle observations, we try to separate forest overstory and understory LAI over the global needleleaf and DBFs areas with a spatial resolution of 1 km. Although uncertainties still exist due to the many factors discussed above, this work would help us better understand the seasonal patterns of forest structure,

evaluate the ecosystem functions and improve the modelling of the forest carbon and water cycles. It is difficult to validate the forest understory and overstory LAI directly due to the lack of field measurements with separation of vertical layers, especially of understory LAI. Further studies of the structural characteristics of the forests are necessary to evaluate the remote sensing overstory and understory LAI datasets.

## 5 Acknowledgments

This research was funded by Key research and development programs for global change and adaptation (2016YFA0600201), National Natural Science Foundation of China (41301354), Distinctive Institutes development program, CAS (TSYJS04) and Youth Science Funds of LREIS, CAS (08R8B6G0YA). JP was supported by Estonian Science Foundation grant PUT232. The MODIS data were downloaded from the Land Processes Distributed Active Archive Center. We gratefully  
10 acknowledge Hideki Kobayashi for providing the overstory and understory LAI data set for the Siberian larch forest.

## References

- Bacour, C., Baret, F., Beal, D., Weiss, M., and Pavageau, K.: Neural network estimation of LAI, fAPAR, fCover and LAI<sub>C</sub>(ab), from top of canopy MERIS reflectance data: Principles and validation, *Remote Sens. Environ.*, 105, 313-325, 10.1016/j.rse.2006.07.014, 2006.
- 15 Baret, F., Hagolle, O., Geiger, B., Bicheron, P., Miras, B., Huc, M., Berthelot, B., Nino, F., Weiss, M., Samain, O., Roujean, J. L., and Leroy, M.: LAI, fAPAR and fCover CYCLOPES global products derived from VEGETATION - Part 1: Principles of the algorithm, *Remote Sens. Environ.*, 110, 275-286, 10.1016/j.rse.2007.02.018, 2007.
- Baret, F., Weiss, M., Lacaze, R., Camacho, F., Makhmara, H., Pacholczyk, P., and Smets, B.: GEOV1: LAI and FAPAR essential climate variables and FCOVER global time series capitalizing over existing products. Part1: Principles of  
20 development and production, *Remote Sens. Environ.*, 137, 299-309, 10.1016/j.rse.2012.12.027, 2013.
- Barr, A. G., Black, T. A., Hogg, E. H., Kljun, N., Morgenstern, K., and Nesic, Z.: Inter-annual variability in the leaf area index of a boreal aspen-hazelnut forest in relation to net ecosystem production, *Agric. For. Meteorol.*, 126, 237-255, 10.1016/j.agrformet.2004.06.011, 2004.
- Braswell, B. H., Schimel, D. S., Linder, E., and Moore, B.: The response of global terrestrial ecosystems to interannual  
25 temperature variability, *Science*, 278, 870-872, 10.1126/science.278.5339.870, 1997.
- Canisius, F., and Chen, J. M.: Retrieving forest background reflectance in a boreal region from Multi-angle Imaging SpectroRadiometer (MISR) data, *Remote Sens. Environ.*, 107, 312-321, 10.1016/j.rse.2006.07.023, 2007.
- Chen, J. M., and Leblanc, S. G.: A four-scale bidirectional reflectance model based on canopy architecture, *IEEE Trans. Geosci. Remote Sensing*, 35, 1316-1337, 10.1109/36.628798, 1997.

- Chen, J. M., Rich, P. M., Gower, S. T., Norman, J. M., and Plummer, S.: Leaf area index of boreal forests: Theory, techniques, and measurements, *J. Geophys. Res.-Atmos.*, 102, 29429-29443, 10.1029/97jd01107, 1997.
- Chen, J. M., Liu, J., Cihlar, J., and Goulden, M. L.: Daily canopy photosynthesis model through temporal and spatial scaling for remote sensing applications, *Ecol. Model.*, 124, 99-119, 10.1016/s0304-3800(99)00156-8, 1999.
- 5 Chen, J. M., Pavlic, G., Brown, L., Cihlar, J., Leblanc, S. G., White, H. P., Hall, R. J., Peddle, D. R., King, D. J., Trofymow, J. A., Swift, E., Van der Sanden, J., and Pellikka, P. K. E.: Derivation and validation of Canada-wide coarse-resolution leaf area index maps using high-resolution satellite imagery and ground measurements, *Remote Sens. Environ.*, 80, 165-184, 2002.
- Deering, D. W., Eck, T. F., and Banerjee, B.: Characterization of the reflectance anisotropy of three boreal forest canopies in  
10 spring-summer, *Remote Sens. Environ.*, 67, 205-229, 1999.
- Deng, F., Chen, J. M., Plummer, S., Chen, M. Z., and Pisek, J.: Algorithm for global leaf area index retrieval using satellite imagery, *IEEE Trans. Geosci. Remote Sensing*, 44, 2219-2229, 10.1109/tgrs.2006.872100, 2006.
- Gitelson, A. A., and Kaufman, Y. J.: MODIS NDVI optimization to fit the AVHRR data series spectral considerations, *Remote Sens. Environ.*, 66, 343-350, 10.1016/s0034-4257(98)00065-0, 1998.
- 15 Gower, S. T., Kucharik, C. J., and Norman, J. M.: Direct and indirect estimation of leaf area index, f(APAR), and net primary production of terrestrial ecosystems, *Remote Sens. Environ.*, 70, 29-51, 10.1016/s0034-4257(99)00056-5, 1999.
- He, L. M., Chen, J. M., Pisek, J., Schaaf, C. B., and Strahler, A. H.: Global clumping index map derived from the MODIS BRDF product, *Remote Sens. Environ.*, 119, 118-130, doi:10.1016/j.rse.2011.12.008, 2012.
- Heiskanen, J., Rautiainen, M., Korhonen, L., Mottus, M., and Stenberg, P.: Retrieval of boreal forest LAI using a forest  
20 reflectance model and empirical regressions, *Int. J. Appl. Earth Obs. Geoinf.*, 13, 595-606, 10.1016/j.jag.2011.03.005, 2011.
- Herwitz, S. R., Levia, D. F., and Ewe, S. M. L.: Transpiration rates of the understory annual *Impatiens capensis* (Balsaminaceae) in response to the autumnal changes in canopy leaf area, *Flora*, 199, 524-530, 10.1078/0367-2530-00181, 2004.
- 25 Huang, J., Zeng, Y., Wu, W., Mao, K., Xu, J., and Su, W.: Estimation of Overstory and Understory Leaf Area Index by Combining Hyperion and Panchromatic QuickBird Data Using Neural Network Method, *Sensor Letters*, 9, 964-973, 10.1166/sl.2011.1380, 2011.
- Jiao, T., Liu, R. G., Liu, Y., Pisek, J., and Chen, J. M.: Mapping global seasonal forest background reflectivity with Multi-angle Imaging Spectroradiometer data, *J. Geophys. Res.-Biogeosci.*, 119, 1063-1077, 10.1002/2013jg002493, 2014.
- 30 Kim, D., Oren, R., and Qian, S. S.: Response to CO<sub>2</sub> enrichment of understory vegetation in the shade of forests, *Global Change Biology*, 22(2), 944-956, doi:10.1111/gcb.13126, 2016.
- Kobayashi, H., Delbart, N., Suzuki, R., and Kushida, K.: A satellite-based method for monitoring seasonality in the overstory leaf area index of Siberian larch forest, *J. Geophys. Res.-Biogeosci.*, 115, 10.1029/2009jg000939, 2010.

- Law, B. E., and Waring, R. H.: Remote-sensing of leaf area index and radiation intercepted by understory vegetation, *Ecol. Appl.*, 4, 272-279, 10.2307/1941933, 1994.
- Liang, L., Schwartz, M. D., and Fei, S. L.: Photographic assessment of temperate forest understory phenology in relation to springtime meteorological drivers, *Int. J. Biometeorol.*, 56, 343-355, 10.1007/s00484-011-0438-1, 2012.
- 5 Liu, Y., Liu, R. G., and Chen, J. M.: Retrospective retrieval of long-term consistent global leaf area index (1981-2011) from combined AVHRR and MODIS data, *J. Geophys. Res.-Biogeosci.*, 117, 14, 10.1029/2012jg002084, 2012a.
- Liu, Y., Liu, R. G., Chen, J. M., and Ju, W. M.: Expanding MISR LAI Products to High Temporal Resolution with MODIS Observations, *IEEE Trans. Geosci. Remote Sensing*, 50, 3915-3927, 10.1109/tgrs.2012.2185828, 2012b.
- Liu, R. G., and Liu, Y.: Generation of new cloud masks from MODIS land surface reflectance products, *Remote Sens. Environ.*, 133, 21-37, 10.1016/j.rse.2013.01.019, 2013.
- 10 Maeno, H., and Hiura, T.: The effect of leaf phenology of overstory trees on the reproductive success of an understory shrub, *Staphylea bumalda* DC, *Can. J. Bot.-Rev. Can. Bot.*, 78, 781-785, 2000.
- Marques, M. C. M., and Oliveira, P. E. A. M.: Phenology of canopy and understory species of two Coastal Plain Forests in Southern Brazil, *Brazilian Journal of Botany*, 27, 713-723, 10.1590/s0100-84042004000400011, 2004.
- 15 Myneni, R. B., Hoffman, S., Knyazikhin, Y., Privette, J. L., Glassy, J., Tian, Y., Wang, Y., Song, X., Zhang, Y., Smith, G. R., Lotsch, A., Friedl, M., Morisette, J. T., Votava, P., Nemani, R. R., and Running, S. W.: Global products of vegetation leaf area and fraction absorbed PAR from year one of MODIS data, *Remote Sens. Environ.*, 83, 214-231, 2002.
- Nikopensius, M., Pisek, J., and Raabe, K.: Spectral reflectance patterns and seasonal dynamics of common understory types in three mature hemi-boreal forests, *Int. J. Appl. Earth Obs. Geoinf.*, 43, 84-91, doi:10.1016/j.jag.2014.11.012, 2015.
- 20 Peltoniemi, J. I., Kaasalainen, S., Naranen, J., Rautiainen, M., Stenberg, P., Smolander, H., Smolander, S., and Voipio, P.: BRDF measurement of understory vegetation in pine forests: dwarf shrubs, lichen, and moss, *Remote Sens. Environ.*, 94, 343-354, doi:10.1016/j.rse.2004.10.009, 2005.
- Pisek, J., and Chen, J. M.: Mapping forest background reflectivity over North America with Multi-angle Imaging SpectroRadiometer (MISR) data, *Remote Sens. Environ.*, 113, 2412-2423, 10.1016/j.rse.2009.07.003, 2009.
- 25 Pisek, J., Chen, J. M., Miller, J. R., Freemantle, J. R., Peltoniemi, J. I., and Simic, A.: Mapping Forest Background Reflectance in a Boreal Region Using Multiangle Compact Airborne Spectrographic Imager Data, *IEEE Trans. Geosci. Remote Sensing*, 48, 499-510, 10.1109/tgrs.2009.2024756, 2010a.
- Pisek, J., Chen, J. M., Alikas, K., and Deng, F.: Impacts of including forest understory brightness and foliage clumping information from multiangular measurements on leaf area index mapping over North America, *J. Geophys. Res.-Biogeosci.*, 115, 13, 10.1029/2009jg001138, 2010b.
- 30 Pisek, J., Rautiainen, M., Heiskanen, J., and Mottus, M.: Retrieval of seasonal dynamics of forest understory reflectance in a Northern European boreal forest from MODIS BRDF data, *Remote Sens. Environ.*, 117, 464-468, 10.1016/j.rse.2011.09.012, 2012.

- Pisek, J., Rautiainen, M., Nikopensus, M., and Raabe, K.: Estimation of seasonal dynamics of understory NDVI in northern forests using MODIS BRDF data: Semi-empirical versus physically-based approach, *Remote Sens. Environ.*, 163, 42-47, 2015.
- Pisek, J., Chen, J. M., Kobayashi, H., Rautiainen, M., Schaepman, M. E., Karnieli, A., Sprintsin, M., Ryu, Y., Nikopensus, M., and Raabe, K. Retrieval of seasonal dynamics of forest understory reflectance from semiarid to boreal forests using MODIS BRDF data, *J. Geophys. Res.-Biogeosci.*, 121, 855-863, 2016.
- Privette, J. L., Asner, G. P., Conel, J., Huemmrich, K. F., Olson, R., Rango, A., Rahman, A. F., Thome, K., and Walter-Shea, E. A.: The EOS prototype validation exercise (PROVE) at Jornada: Overview and lessons learned, *Remote Sensing of Environment*, 74, 1-12, 10.1016/s0034-4257(00)00117-6, 2000.
- Qi, Y. J., Li, F. R., Liu, Z. L., and Jin, G. Z.: Impact of understory on overstory leaf area index estimation from optical remote sensing in five forest types in northeastern China, *Agric. For. Meteorol.*, 198-199, 72-80, 2014.
- Qiao, Y. F., Miao, S. J., Silva, L. C. R., and Horwath, W. R.: Understory species regulate litter decomposition and accumulation of C and N in forest soils: A long-term dual-isotope experiment, *For. Ecol. Manage.*, 329, 318-327, 10.1016/j.foreco.2014.04.025, 2014.
- Rautiainen, M., and Heiskanen, J.: Seasonal contribution of understory vegetation to the reflectance of a boreal landscape at different spatial scales, *IEEE Geosci.Remote Sens. Lett.*, 10, 923-927, 2013.
- Rentch, J. S., Fajvan, M. A., and Hicks, R. R.: Oak establishment and canopy accession strategies in five old-growth stands in the central hardwood forest region, *For. Ecol. Manage.*, 184, 285-297, 10.1016/s0378-1127(03)00155-5, 2003.
- Ryu, Y., Lee, G., Jeon, S., Song, Y., and Kimm, H.: Monitoring multi-layer canopy spring phenology of temperate deciduous and evergreen forests using low-cost spectral sensors, *Remote Sens. Environ.*, 149, 227-238, 10.1016/j.rse.2014.04.015, 2014.
- Suchar, V. A., and Crookston, N. L.: Understory cover and biomass indices predictions for forest ecosystems of the Northwestern United States, *Ecol. Indic.*, 10, 602-609, 10.1016/j.ecolind.2009.10.004, 2010.
- Tang, H., Ganguly, S., Zhang, G., Hofton, M. A., Nelson, R. F., and Dubayah, R.: Characterizing leaf area index (LAI) and vertical foliage profile (VFP) over the United States, *Biogeosciences*, 13, 239-252, doi:10.5194/bg-13-239-2016, 2016.
- Vogel, J. G., and Gower, S. T.: Carbon and nitrogen dynamics of boreal jack pine stands with and without a green alder understory, *Ecosystems*, 1, 386-400, 10.1007/s100219900032, 1998.
- Weiss, M., Baret, F., Garrigues, S., and Lacaze, R.: LAI and fAPAR CYCLOPES global products derived from VEGETATION. Part 2: validation and comparison with MODIS collection 4 products, *Remote Sens. Environ.*, 110, 317-331, doi:10.1016/j.rse.2007.03.001, 2007.
